# Supplementary material for: Thiourea catalysed reduction of α-keto substituted acrylate compounds using Hantzsch ester as a reducing agent in water
Source: Royal Society of Chemistry journal article supplement (doi:10.1039/c7ra00995j), 2017-01-01

## Supporting Information

### Thiourea catalysed reduction of $\alpha$ -keto substituted acrylate compounds using Hantzsch ester as reducing agent in water

Guanglin Weng<sup>a#</sup>, Xiaobo Ma<sup>a#</sup>, Dongmei Fang<sup>b</sup>, Ping Tan<sup>a</sup>, Lijiao Wang<sup>a</sup>, Linlin Yang<sup>a</sup>, Yuanyuan Zhang<sup>a</sup>, Shan Qian<sup>\*a</sup>, Zhouyu Wang<sup>\*a</sup>

<sup>a</sup> Department of Chemistry, Xihua University, Chengdu, 610039, China. E-mail: zhouyuwang77@gmail.com, qians33@163.com <sup>b</sup> Chengdu Institute of Biology, Chinese Academy of Sciences, Chengdu, 610041, China. <sup>#</sup>These authors contributed equally to this work and should be considered co-first authors. Fax: +86-028-8772-3006; Tel: +86-028-8772-9463

**General Methods:** All starting materials were of the commercially available (analytical grade) and used without further purification. All the solvents are used after redistillation. Reactions were monitored by thin layer chromatography using silica gel HSGF254 plates. Flash chromatography was performed using silica gel HG/T2354-92. Melting points were measured with SGW X-4 melting point apparatus. <sup>1</sup>H NMR (400 MHz) spectra were recorded in CDCl<sub>3</sub> or DMSO. <sup>1</sup>H NMR chemical shifts are reported in ppm ( $\delta$ ) relative to tetramethylsilane (TMS) with the solvent resonance employed as the internal standard. Data are reported as follows: chemical shift, multiplicity (s = singlet, d = doublet, q = quartet, m = multiplet), coupling constants (Hz) and integration. <sup>13</sup>C NMR chemical shifts are reported in ppm from tetramethylsilane (TMS) with the solvent resonance as the internal standard. Chemical yields refer to pure isolated substances. All products were prepared according to the general procedure. Products **6a-6g**, **6k-6s**, **6u-6z** are known compounds and their <sup>1</sup>H NMR data matched the literature data<sup>[1-10]</sup>.

#### General experimental procedures for preparing of Cat 1-6:

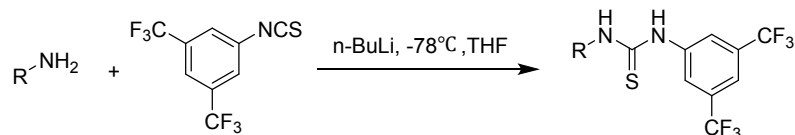

Under an argon atmosphere, to a solution of 3,5-bis(trifluoromethyl)aniline (2 mmol) in THF (5 mL), n-BuLi (2.4 mmol) was added slowly at -78°C. After stirring for 15 minutes, the reaction mixture was then allowed to warm to room temperature and stirring for another 15 minutes, a solution of isothiocyanate (2.2 mmol) in THF (2 mL) was added dropwise, stirred at room temperature overnight. The products was purified by a flash chromatography on silica gel.

#### Experimental procedure for preparing of Cat 7:

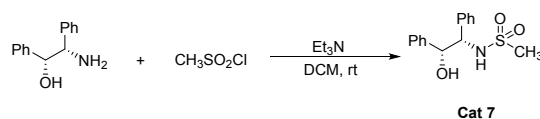

To a stirred solution of (1R,2S)-2-amino-1,2-diphenylethanol (1 mmol) and triethylamine (1.2 mmol) in DCM (3 mL), methanesulfonyl chloride (1.1 mmol) was added dropwise. The reaction mixture was stirred for 12h at room temperature. The product was purified by a flash chromatography on silica gel.

#### Experimental procedure for preparing of Cat 8:

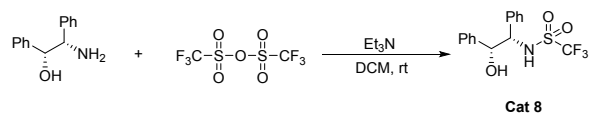

To a stirred solution of (1R,2S)-2-amino-1,2-diphenylethanol (1 mmol) and triethylamine (1.2 mmol) in DCM (3 mL), trifluoromethanesulfonic anhydride (1 mmol) was added dropwise at room temperature. The reaction mixture was stirred overnight under room temperature. The product was purified by a flash chromatography on silica gel.

#### General procedure for preparation of $\alpha$ -keto substituted acrylate compounds **5**:

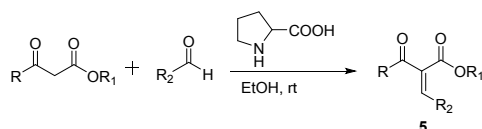

The mixture of  $\beta$ -Keto esters (10 mmol), aromatic aldehyde (12 mmol) and proline (2 mmol) in EtOH (40 mL) was stirred at room temperature for 2d. The solvent was removed under reduced pressure. The product was purified by a flash chromatography on silica gel.

#### General procedure for synthesis of $\alpha$ -alkyl- $\beta$ -ketoesters:

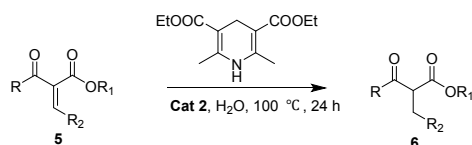

The **5** (0.2 mmol), dihydropyridine esters (0.24 mmol) and catalyst (0.04 mmol) were refluxed at 100°C in H<sub>2</sub>O (2 mL) for 24 hours. After the reaction mixtures were cooled to room temperature, the crude solution was extracted with ethyl acetate (3 x 5 mL). The combined organic layers were washed with brine and dried over anhydrous Na<sub>2</sub>SO<sub>4</sub>. After removal of solvents under reduced pressure, the residue was purified through column chromatograph on silica gel to give the pure products.

#### The gram-scale synthesis of ethyl 2-benzyl-3-oxo-3-phenylpropanoate:

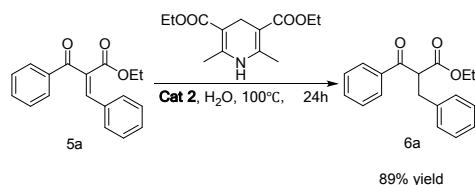

The **5a** (4 mmol, 1.12g), dihydropyridine esters (4.8 mmol, 1.01g) and catalyst **2** (0.8 mmol, 387mg) were refluxed at 100°C in H<sub>2</sub>O (30mL) for 24 hours. After the reaction mixtures were cooled to room temperature, the crude solution was extracted with ethyl acetate (3 x 50 mL). The combined organic layers were washed with brine and dried over anhydrous Na<sub>2</sub>SO<sub>4</sub>. After removal of solvents under reduced pressure, the residue was purified through column chromatograph on silica gel to give the pure products.

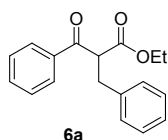

**ethyl 2-benzyl-3-oxo-3-phenylpropanoate (6a):** The crude mixture was purified by column chromatography to yield **6a** as light yellow liquid with 93% yield.  $^1\text{H}$  NMR (600 MHz,  $\text{CDCl}_3$ ):  $\delta$  7.96 (d,  $J = 7.98$  Hz, 2H), 7.56 (t,  $J = 7.26$  Hz, 1H), 7.45 (d,  $J = 7.50$  Hz, 2H), 7.23 - 7.27 (m, 5H), 7.19 (t,  $J = 7.08$  Hz, 1H), 4.62 (t,  $J = 7.26$  Hz, 1H), 4.11 (q,  $J = 6.96$  Hz, 2H), 3.30 - 3.37 (m, 2H), 1.11 (t,  $J = 7.02$  Hz, 3H).

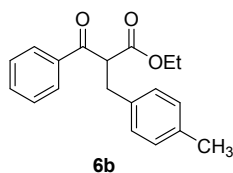

**ethyl 2-(4-methylbenzyl)-3-oxo-3-phenylpropanoate (6b):** The crude mixture was purified by column chromatography to yield **6b** as colorless liquid with 88% yield.  $^1\text{H}$  NMR (400 MHz,  $\text{CDCl}_3$ ):  $\delta$  7.98 - 8.00 (m, 2H), 7.59 - 7.60 (m, 1H), 7.48 (m, 2H), 7.14 (d,  $J = 8.0$  Hz, 2H), 7.09 (d,  $J = 7.92$  Hz, 2H), 4.63 (t,  $J = 7.28$  Hz, 1H), 4.09 - 4.17 (m, 2H), 3.30 - 3.33 (m, 2H), 2.31 (s, 3H), 1.15 (t,  $J = 7.12$  Hz, 3H).

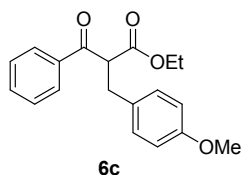

**ethyl 2-(4-methoxybenzyl)-3-oxo-3-phenylpropanoate (6c):** The crude mixture was purified by column chromatography to yield **6c** as colorless liquid with 76% yield.  $^1\text{H}$  NMR (400 MHz,  $\text{CDCl}_3$ ):  $\delta$  7.98 (d,  $J = 7.56$  Hz, 2H), 7.58 (t,  $J = 7.36$  Hz, 1H), 7.47 (t,  $J = 7.84$  Hz, 2H), 7.17 (d,  $J = 8.56$  Hz, 2H), 6.81 (d,  $J = 8.60$  Hz, 2H), 4.60 (t,  $J = 7.32$  Hz, 1H), 4.12 (q,  $J = 7.16$  Hz, 2H), 3.78 (s, 3H), 3.29 (dd,  $J = 2.28, 7.64$  Hz, 2H), 1.14 (t,  $J = 7.12$  Hz, 3H).

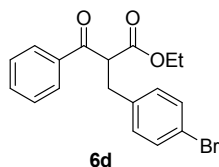

**ethyl 2-(4-bromobenzyl)-3-oxo-3-phenylpropanoate (6d):** The crude mixture was purified by column chromatography to yield **6d** as colorless liquid with 94% yield.  $^1\text{H}$  NMR (400 MHz,  $\text{CDCl}_3$ ):  $\delta$  7.99 - 7.96 (m, 2H), 7.60 (t,  $J = 7.36$  Hz, 1H), 7.48 (t,  $J = 7.92$  Hz, 2H), 7.39 - 7.41 (m, 2H), 7.13 (d,  $J = 8.36$  Hz, 2H), 4.60 (t,  $J = 7.36$  Hz, 1H), 4.07 - 4.16 (m, 2H), 3.30 (d,  $J = 7.36$  Hz, 2H), 1.14 (t,  $J = 7.12$  Hz, 3H).

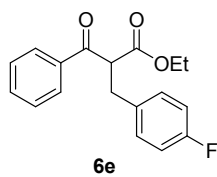

**6e**

**ethyl 2-(4-fluorobenzyl)-3-oxo-3-phenylpropanoate (6e):** The crude mixture was

purified by column chromatography to yield **6e** as colorless liquid with 90% yield.  $^1\text{H}$  NMR (400 MHz,  $\text{CDCl}_3$ ):  $\delta$  7.98 - 7.96 (m, 2H), 7.61 - 7.57 (m, 1H), 7.49 - 7.46 (m, 2H), 7.24 - 7.20 (m, 2H), 6.99 - 6.93 (m, 2H), 4.60 (t,  $J$  = 7.36 Hz, 1H), 4.18 - 4.08 (m, 2H), 3.32 (d,  $J$  = 7.40 Hz, 2H), 1.14 (t,  $J$  = 7.12 Hz, 3H).

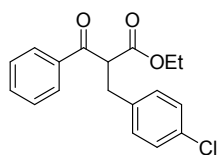

**6f**

**ethyl 2-(4-chlorobenzyl)-3-oxo-3-phenylpropanoate (6f):** The crude mixture was

purified by column chromatography to yield **6f** as colorless liquid with 92% yield.  $^1\text{H}$  NMR (400 MHz,  $\text{CDCl}_3$ ):  $\delta$  7.97 (d,  $J$  = 7.24 Hz, 2H), 7.60 (t,  $J$  = 7.36 Hz, 1H), 7.48 (t,  $J$  = 7.92 Hz, 2H), 7.26 (t,  $J$  = 8.48 Hz, 2H), 7.19 (d,  $J$  = 8.48 Hz, 2H), 4.60 (t,  $J$  = 7.36 Hz, 1H), 4.16-4.08 (m, 2H), 3.31 (d,  $J$  = 7.36 Hz, 2H), 1.14 (t,  $J$  = 7.12 Hz, 3H).

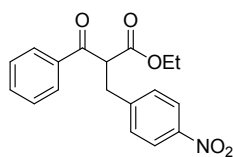

**6g**

**ethyl 2-(4-nitrobenzyl)-3-oxo-3-phenylpropanoate (6g):** The crude mixture

was purified by column chromatography to yield **6g** as light yellow liquid with 90% yield.  $^1\text{H}$  NMR (400 MHz,  $\text{CDCl}_3$ ):  $\delta$  8.14 (d,  $J$  = 8.68 Hz, 2H), 7.99 - 7.97 (m, 2H), 7.61 (t,  $J$  = 7.48 Hz, 1H), 7.51 - 7.42 (m, 4H), 4.66 (t,  $J$  = 7.36 Hz, 1H), 4.15 - 4.11 (m, 2H), 3.45 (d,  $J$  = 7.48 Hz, 2H), 1.14 (t,  $J$  = 7.12 Hz, 3H).

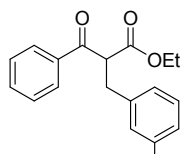

**6h**

**ethyl 2-(3-nitrobenzyl)-3-oxo-3-phenylpropanoate (6h):** The crude mixture was

purified by column chromatography to yield **6h** as light yellow liquid with 86% yield.  $^1\text{H}$  NMR (400 MHz,  $\text{CDCl}_3$ ): 8.15 (s, 1H), 8.09 (d,  $J$  = 8.16 Hz, 1H), 7.99 (d,  $J$  = 7.32 Hz, 2H), 7.61 (t,  $J$  = 7.40 Hz, 2H), 7.51 - 7.44 (m, 3H), 4.67 (t,  $J$  = 7.40 Hz, 1H), 4.13 (q,  $J$  = 7.12 Hz, 2H), 3.45 (d,  $J$  = 7.40 Hz, 2H), 1.14 (t,  $J$  = 7.12 Hz, 3H).  $^{13}\text{C}$  NMR (100 MHz,  $\text{CDCl}_3$ ): 193.6, 168.7, 148.3, 140.5, 135.8, 135.5, 133.8, 129.4, 128.8, 128.6, 123.8, 121.9, 61.9, 55.6, 34.2, 13.9.

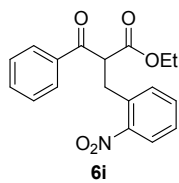

**ethyl 2-(2-nitrobenzyl)-3-oxo-3-phenylpropanoate (6i):** The crude mixture was purified by column chromatography to yield **6i** as light yellow liquid with 83% yield.  $^1\text{H}$  NMR (400 MHz,  $\text{CDCl}_3$ ):  $\delta$  8.01 - 7.97 (m, 3H), 7.60 - 7.37 (m, 6H), 4.94 (t,  $J$  = 7.68 Hz, 1H), 4.19 - 4.06 (m, 2H), 3.68 - 3.55 (m, 2H), 1.11 (t,  $J$  = 7.12 Hz, 3H).  $^{13}\text{C}$  NMR (100 MHz,  $\text{CDCl}_3$ ): 194.3, 168.9, 149.2, 136.1, 133.7, 133.6, 133.5, 133.3, 128.7, 128.1, 125.1, 61.6, 54.2, 32.5, 13.9.

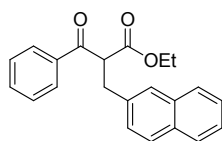

**ethyl 2-(naphthalen-2-ylmethyl)-3-oxo-3-phenylpropanoate (6j):** The crude mixture was purified by column chromatography to yield **6j** as light yellow liquid with 93% yield.  $^1\text{H}$  NMR (400 MHz,  $\text{CDCl}_3$ ):  $\delta$  8.08 (d,  $J$  = 8.40 Hz, 1H), 7.92 - 7.87 (m, 3H), 7.74 (d,  $J$  = 7.92 Hz, 1H), 7.59 - 7.50 (m, 3H), 7.43 - 7.34 (m, 4H), 4.84 (t,  $J$  = 7.16 Hz, 1H), 4.13 - 4.08 (m, 2H), 3.86 (d,  $J$  = 7.16 Hz, 2H), 1.11 (t,  $J$  = 7.12 Hz, 3H).  $^{13}\text{C}$  NMR (100 MHz,  $\text{CDCl}_3$ ): 194.7, 169.5, 136.3, 134.2, 133.9, 133.5, 131.7, 129.0, 128.6, 127.5, 127.4, 126.2, 125.6, 125.4, 123.3, 61.6, 54.9, 31.7, 13.9.

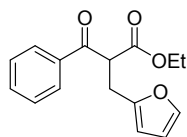

**ethyl 2-(furan-2-ylmethyl)-3-oxo-3-phenylpropanoate (6k):** The crude mixture was purified by column chromatography to yield **6k** as colorless liquid with 88% yield.  $^1\text{H}$  NMR (400 MHz,  $\text{CDCl}_3$ ):  $\delta$  8.02 - 8.00 (m, 2H), 7.62 - 7.59 (m, 1H), 7.50 - 7.47 (m, 2H), 7.30 - 7.29 (m, 1H), 6.26 - 6.25 (m, 1H), 6.08 - 6.07 (m, 1H), 4.77 (t,  $J$  = 7.24 Hz, 1H), 4.18 - 4.12 (m, 2H), 3.44 - 3.32 (m, 2H), 1.17 (t,  $J$  = 7.12 Hz, 3H).

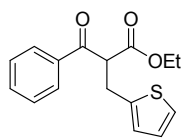

**ethyl 3-oxo-3-phenyl-2-(thiophen-2-ylmethyl)propanoate (6l):** The crude mixture was purified by column chromatography to yield **6l** as colorless liquid with 77% yield.  $^1\text{H}$  NMR (400 MHz,  $\text{CDCl}_3$ ):  $\delta$  8.01 (d,  $J$  = 7.24 Hz, 2H), 7.60 (t,  $J$  = 7.36 Hz, 1H), 7.48 (t,  $J$  = 7.88 Hz, 2H), 7.12 (d,  $J$  = 1.16 Hz, 1H), 6.90 - 6.86 (m, 2H), 4.68 (t,  $J$  = 7.20 Hz, 1H), 4.16 - 4.13 (m, 2H), 3.59 - 3.56 (dd,  $J$  = 3.72, 7.28 Hz, 2H), 1.17 (t,  $J$  = 7.12 Hz, 3H).

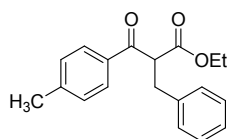

**ethyl 2-benzyl-3-oxo-3-(p-tolyl)propanoate (6m):** The crude mixture was

purified by column chromatography to yield **6m** as colorless liquid with 87% yield. <sup>1</sup>H NMR (400 MHz, CDCl<sub>3</sub>): δ 7.89 (d, *J*=8.12 Hz, 2H), 7.31-7.22 (m, 7H), 4.62 (t, *J*=7.32 Hz, 1H), 4.14-4.09 (m, 2H), 3.34 (dd, *J*=4.56, 7.64 Hz, 2H), 2.42 (s, 3H), 1.14 (t, *J*=7.12 Hz, 3H).

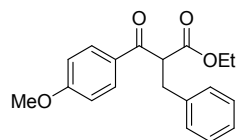

**6n**

**ethyl 2-benzyl-3-(4-methoxyphenyl)-3-oxopropanoate (6n):** The crude mixture

was purified by column chromatography to yield **6n** as colorless liquid with 82% yield. <sup>1</sup>H NMR (400 MHz, CDCl<sub>3</sub>): δ 7.99 - 7.97 (m, 2H), 7.29 - 7.23 (m, 5H), 6.95 - 6.93 (m, 2H), 4.60 (t, *J* = 7.24 Hz, 1H), 4.13 - 4.10 (m, 2H), 3.88 (s, 3H), 3.35 - 3.29 (m, 2H), 1.15 (t, *J*=7.12 Hz, 3H).

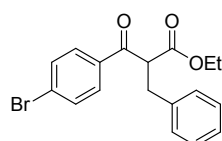

**6o**

**ethyl 2-benzyl-3-(4-bromophenyl)-3-oxopropanoate (6o):** The crude mixture

was purified by column chromatography to yield **6o** as colorless liquid with 90% yield. <sup>1</sup>H NMR (400 MHz, CDCl<sub>3</sub>): δ 7.83 (d, *J* = 8.56 Hz, 2H), 7.60 (d, *J* = 8.56 Hz, 2H), 7.30 - 7.21 (m, 5H), 4.58 (t, *J* = 7.36 Hz, 1H), 4.16 - 4.09 (m, 2H), 3.34 (dd, *J* = 1.60, 7.48 Hz, 2H), 1.14 (t, *J* = 7.12 Hz, 3H).

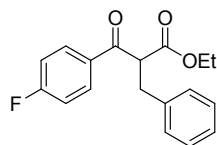

**6p**

**ethyl 2-benzyl-3-(4-fluorophenyl)-3-oxopropanoate (6p):** The crude mixture was

purified by column chromatography to yield **6p** as colorless liquid with 95% yield. <sup>1</sup>H NMR (400 MHz, CDCl<sub>3</sub>): δ 8.03 - 7.99 (m, 2H), 7.30 - 7.18 (m, 5H), 7.13 (t, *J* = 7.36 Hz, 2H), 4.60 (t, *J* = 7.2 Hz, 1H), 4.17 - 4.09 (m, 2H), 3.39 - 3.30 (dd, *J* = 2.84, 7.44 Hz, 2H), 1.14 (t, *J* = 7.12 Hz, 3H).

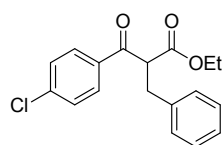

**6q**

**ethyl 2-benzyl-3-(4-chlorophenyl)-3-oxopropanoate (6q):** The crude mixture

was purified by column chromatography to yield **6q** as colorless liquid with 92% yield. <sup>1</sup>H NMR (400 MHz, CDCl<sub>3</sub>): δ 7.91 (d, *J* = 8.56 Hz, 2H), 7.43 (d, *J* = 8.52 Hz, 2H), 7.29 - 7.19 (m, 5H), 4.59 (t, *J* = 7.36 Hz, 1H), 4.16 - 4.09 (m, 2H), 3.34 (dd, *J* = 1.80, 7.44 Hz, 2H), 1.14 (t, *J* = 7.12 Hz, 3H).

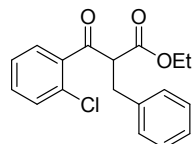

**6r**

**ethyl 2-benzyl-3-(2-chlorophenyl)-3-oxopropanoate (6r):** The crude mixture

was purified by column chromatography to yield **6r** as colorless liquid with 82% yield. <sup>1</sup>H NMR (400 MHz, CDCl<sub>3</sub>): δ 7.48 - 7.26 (m, 10H), 4.62 - 4.58 (t, *J* = 7.42 Hz, 1H), 4.13 - 4.06 (m, 2H), 3.38 - 3.28 (m, 2H), 1.14 - 1.10 (t, *J* = 7.12 Hz, 3H).

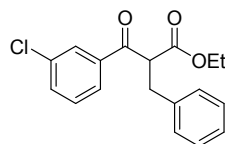

**6s**

**ethyl 2-benzyl-3-(3-chlorophenyl)-3-oxopropanoate (6s):** The crude mixture was purified by column chromatography to yield **6s** as colorless liquid with 85% yield.  $^1\text{H}$  NMR (400 MHz,  $\text{CDCl}_3$ ):  $\delta$  7.94 (s, 1H), 7.83 (d,  $J = 7.84$  Hz, 1H), 7.55 (d,  $J = 7.00$  Hz, 1H), 7.40 (t,  $J = 7.90$  Hz, 1H), 7.30 - 7.20 (m, 5H), 4.58 (t,  $J = 7.36$  Hz, 1H), 4.18 - 4.10 (m, 2H), 3.35 (d,  $J = 7.36$  Hz, 2H), 1.15 (t,  $J = 7.12$  Hz, 3H).

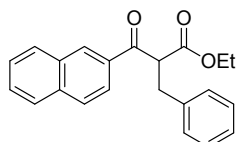

**6t**

**ethyl 2-benzyl-3-(naphthalen-2-yl)-3-oxopropanoate (6t):** The crude mixture was purified by column chromatography to yield **6t** as colorless liquid with 88% yield.  $^1\text{H}$  NMR (400 MHz,  $\text{CDCl}_3$ ):  $\delta$  8.50 (s, 1H), 8.05 (dd,  $J = 1.6, 8.72$  Hz, 1H), 7.96 (d,  $J = 7.26$  Hz, 1H), 7.89 (t,  $J = 8.20$  Hz, 2H), 7.65-7.56 (m, 2H), 7.30 - 7.29 (m, 4H), 7.23 - 7.20 (m, 1H), 4.81 (t,  $J = 7.32$  Hz, 1H), 4.18 - 4.09 (m, 2H), 3.42 (dd,  $J = 2.04, 7.60$  Hz, 2H), 1.14 (t,  $J = 7.12$  Hz, 3H).  $^{13}\text{C}$  NMR (100 MHz,  $\text{CDCl}_3$ ): 197.3, 168.6, 138.3, 138.1, 132.0, 131.2, 130.6, 130.1, 129.9, 129.3, 129.0, 128.5, 127.9, 126.8, 125.7, 61.6, 59.8, 34.3, 13.9.

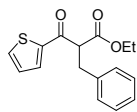

**6u**

**ethyl 2-benzyl-3-oxo-3-(thiophen-2-yl)propanoate (6u):** The crude mixture was purified by column chromatography to yield **6u** as colorless liquid with 78% yield.  $^1\text{H}$  NMR (400 MHz,  $\text{CDCl}_3$ ):  $\delta$  7.78 (dd,  $J = 0.96, 3.84$  Hz, 1H), 7.69 (dd,  $J = 1.0, 4.96$  Hz, 1H), 7.30 - 7.21 (m, 5H), 7.13 (t,  $J = 8.80$  Hz, 1H), 4.48 (t,  $J = 7.40$  Hz, 3H), 4.18 - 4.12 (m, 2H), 3.37 - 3.35 (m, 2H), 1.18 (t,  $J = 7.12$  Hz, 3H).

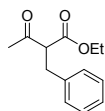

**6v**

**ethyl 2-benzyl-3-oxobutanoate (6v):** The crude mixture was purified by column chromatography to yield **6v** as colorless liquid with 38% yield.  $^1\text{H}$  NMR (400 MHz,  $\text{CDCl}_3$ ):  $\delta$  7.32-7.28 (m, 2H), 7.32 - 7.19 (m, 5H), 4.20 - 4.14 (m, 2H), 3.80 (t,  $J = 7.64$  Hz, 1H), 3.19 (d,  $J = 7.16$  Hz, 2H), 2.21 (s, 3H), 1.23 (t,  $J = 7.12$  Hz, 3H).

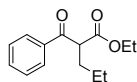

**6w**

**ethyl 2-benzoylpentanoate (6w):** The crude mixture was purified by column chromatography to yield **6w** as colorless liquid with 62% yield.  $^1\text{H}$  NMR (300 MHz,  $\text{CDCl}_3$ ):  $\delta$  7.97-8.00 (m, 2H), 7.55 - 7.60 (m, 1H), 7.44 - 7.49 (m, 2H), 4.30 (t,  $J = 7.14$  Hz, 1H), 4.12 (q,  $J = 7.11$  Hz, 2H), 1.93 - 2.03 (m, 2H), 1.35 - 1.42 (m, 2H), 1.17 (t,  $J = 7.11$  Hz, 3H), 0.95 (t,  $J = 7.26$  Hz, 3H).

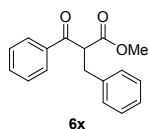

**methyl 2-benzyl-3-oxo-3-phenylpropanoate (6x):** The crude mixture was purified by column chromatography to yield **6x** as colorless liquid with 89% yield. <sup>1</sup>H NMR (400 MHz, CDCl<sub>3</sub>): δ 7.97 (d, *J* = 7.36 Hz, 2H), 7.53 - 7.45 (m, 3H), 7.28 - 7.21 (m, 5H), 4.68 (t, *J* = 7.38 Hz, 1H), 3.67 (s, 3H), 3.30 - 3.40 (m, 2H).

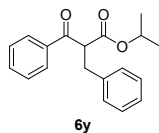

**isopropyl 2-benzyl-3-oxo-3-phenylpropanoate (6y):** The crude mixture was purified by column chromatography to yield **6y** as colorless liquid with 86% yield. <sup>1</sup>H NMR (400 MHz, CDCl<sub>3</sub>): δ 8.00 - 7.98 (m, 2H), 7.58 (t, *J* = 7.60 Hz, 1H), 7.47 (t, *J* = 7.60 Hz, 2H), 7.31 - 7.21 (m, 5H), 5.0 - 4.93 (m, 1H), 4.59 (t, *J* = 7.40 Hz, 1H), 3.34 (d, *J* = 7.36 Hz, 2H), 1.14 (d, *J* = 6.24 Hz, 3H), 1.05 (d, *J* = 6.28 Hz, 3H).

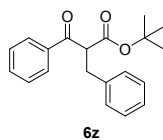

**tert-butyl 2-benzyl-3-oxo-3-phenylpropanoate (6z):** The crude mixture was purified by column chromatography to yield **6z** as light yellow liquid with 85% yield. <sup>1</sup>H NMR (400 MHz, CDCl<sub>3</sub>): δ 7.99 - 7.97 (m, 2H), 7.60 - 7.56 (m, 1H), 7.49 - 7.45 (m, 2H), 7.29 - 7.19 (m, 5H), 4.53 (t, *J* = 7.36 Hz, 1H), 3.32 (d, *J* = 7.36 Hz, 2H), 1.31 (s, 9H).

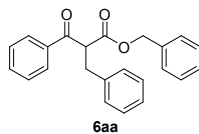

**benzyl 2-benzyl-3-oxo-3-phenylpropanoate (6aa):** The crude mixture was purified by column chromatography to yield **6aa** as colorless liquid with 88% yield. <sup>1</sup>H NMR (400 MHz, CDCl<sub>3</sub>): δ 7.96 - 7.94 (m, 2H), 7.58 (t, *J* = 7.42 Hz, 1H), 7.44 (t, *J* = 7.76 Hz, 2H), 7.30-7.27 (m, 6H), 7.23-7.13 (m, 4H), 5.09 (s, 2H), 4.69 (t, *J* = 7.36 Hz, 1H), 3.36 (d, *J* = 7.24 Hz, 2H).

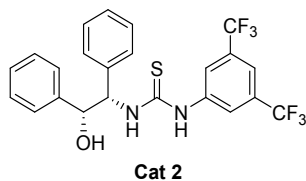

**1-(3,5-bis(trifluoromethyl)phenyl)-3-((1S,2R)-2-hydroxy-1,2-diphenylethyl)thiourea (Cat 2):** The crude mixture was purified by column chromatography to yield **Cat 2** as colorless liquid with 72% yield. <sup>1</sup>H NMR (400 MHz, DMSO): δ 10.35 (s, 1H), 8.72 (d, *J* = 8.60 Hz, 1H), 8.28 (s, 2H), 7.75 (s, 1H), 7.09 - 7.26 (m, 10H), 5.85 (d, *J* = 4.12 Hz, 1H), 5.67-5.64 (m, 1H), 5.12 (s, 1H).

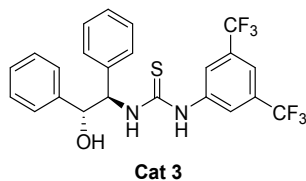

**1-(3,5-bis(trifluoromethyl)phenyl)-3-((1R,2R)-2-hydroxy-1,2-**

**diphenylethyl)thiourea (Cat 3):** The crude mixture was purified by column chromatography to yield **Cat 3** as colorless liquid with 68% yield. <sup>1</sup>HNMR (400 MHz, DMSO): δ 10.54 (s, 1H), 8.69 (d, *J* = 8.24 Hz, 1H), 8.33 (s, 2H), 7.71 (s, 1H), 7.23 -7.51 (m, 10H), 6.00 (d, *J* = 4.36 Hz, 1H), 5.59 (d, *J* = 6.96 Hz, 1H), 4.97 (d, *J* = 3.60 Hz, 1H).

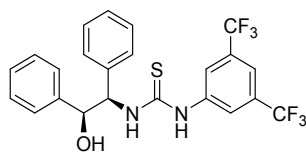

**Cat 5**

**1-(3,5-bis(trifluoromethyl)phenyl)-3-((1R,2S)-2-hydroxy-1,2-**

**diphenylethyl)thiourea (Cat 5):** The crude mixture was purified by column chromatography to yield **Cat 5** as colorless liquid with 70% yield. <sup>1</sup>HNMR (400 MHz, DMSO): δ 10.35 (s, 1H), 8.72 (d, *J* = 8.52 Hz, 1H), 8.28 (s, 2H), 7.75 (s, 1H), 7.09 -7.25 (m, 10H), 5.84 (d, *J* = 4.04 Hz, 1H), 5.85 (d, *J* = 4.04 Hz, 1H), 5.64 - 5.67 (m, 1H), 5.13 (s, 1H).

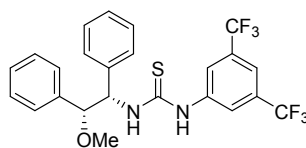

**Cat 5**

**1-(3,5-bis(trifluoromethyl)phenyl)-3-((1S,2R)-2-methoxy-1,2-**

**diphenylethyl)thiourea (Cat 5):** The crude mixture was purified by column chromatography to yield **Cat 5** as colorless liquid with 63% yield. <sup>1</sup>HNMR (400MHz, DMSO): δ 10.27 (s, 1H), 8.72 (d, *J* = 8.76 Hz, 1H), 8.24 (s, 1H), 7.75 (s, 1H), 7.07-7.29 (m, 10H), 5.70-5.73 (m, 1H), 4.75 (d, *J* = 4.84, 1H), 3.22 (s, 3H).

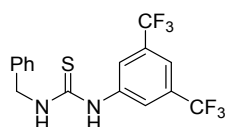

**Cat 6**

**1-benzyl-3-(3,5-bis(trifluoromethyl)phenyl)thiourea (Cat 6):** The crude

mixture was purified by column chromatography to yield **Cat 6** as colorless liquid with 65% yield. <sup>1</sup>HNMR(400MHz,CDCl<sub>3</sub>): colorless liquid; <sup>1</sup>HNMR (400MHz, DMSO) δ 8.04 (s, 1H), 7.76 (s, 2H), 7.72 (s, 1H), 7.35 - 7.42 (m, 5H), 6.40 (s, 1H), 4.85 (d, *J* = 4.0 Hz, 2H).

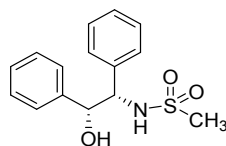

**N-((1S,2R)-2-hydroxy-1,2-diphenylethyl)methanesulfonamide (Cat 7):** The

crude mixture was purified by column chromatography to yield **Cat 7** as colorless liquid with 53% yield. <sup>1</sup>HNMR (400Hz, CDCl<sub>3</sub>): δ 7.27 - 7.32 (m, 6H), 7.07 - 7.13 (m, 4H), 5.32 (d, *J* = 8.56 Hz, 1H), 5.14 - 5.16 (m, 1H), 4.76 (dd, *J* = 4.68 Hz, 8.64 Hz, 1H), 2.58 (s, 3H), 2.43 (d, *J* = 3.96 Hz, 1H).

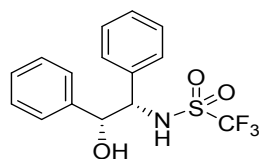

**1,1,1-trifluoro-N-((1S,2R)-2-hydroxy-1,2-**

**diphenylethyl)methanesulfonamide (Cat 8):** The crude mixture was purified by column

chromatography to yield **Cat 8** as colorless liquid with 67% yield. <sup>1</sup>HNMR (400 MHz, CDCl<sub>3</sub>): 10.00 (d, *J* = 9.12 Hz, 1H), 7.25 - 7.33 (m, 10H), 5.68 (d, *J* = 5.0 Hz, 1H), 4.73 (dd, *J* = 5.04, 7.60 Hz, 12.0 Hz, 1H), 4.43 (t, *J* = 8.52 Hz, 1H).

#### References

- [1] H. S. Kim, S. J. Lee, B. Choi, C. M. Yoon, *Synthesis* 2012, **44**, 3161-3164.
- [2] K. B. Raju, V. Mari, K. Nagaiah, *Synthesis* 2013, **45**, 2867-2874.
- [3] J. F. Cheng, M. Chen, D. Wallace, S. Tith, T. Arrhenius, H. Kashiwagi, Y. Ono, A. Ishikawa, H. Sato, T. Kozono, H. Sato, A. M. Nadzan, *Bioorg. Med. Chem.* 2004, **14**, 2411-2415.
- [4] M. Yamauchi, M. Shiota, T. Watanabe, *Uexrocycles*, 1990, **31**, 1699-1704.
- [5] L. Z. Gao, B. C. Kang, G.S. Hwang, D. H. Ryu, *Angew. Chem. Int. Ed.* 2012, **51**, 8322-8325.
- [6] A. R. Katritzky, Z. Q. Wang, M. Y. Wang, C. R. Wilkerson, C. D. Hall, N. G. Akhmedov, *J. Org. Chem.* 2004, **69**, 6617-6622.
- [7] C. Kashima, I. Fukuchi, K. Takahashi, A. Hosomi, *Tetrahedron*, 1996, **52**, 10335-10346.
- [8] W. Li, J. Wang, X. L. Hu, K. Shen, W. T. Wang, Y. Y. Chu, L. L. Lin, X. H. Liu, X. M. Feng, *J. Am. Chem. Soc.* 2010, **132**, 8532-8533.
- [9] D. F. Taber, R. B. Sheth, P. V. Joshi, *J. Org. Chem.* 2005, **70**, 2851-2854.
- [10] O. Roy, A. Riahi, F. Henin, J. Muzart, *Eur. J. Org. Chem.* 2002, **23**, 3986-3994.

## <sup>1</sup>H NMR Spectra:

### The <sup>1</sup>H NMR Spectra of 6a

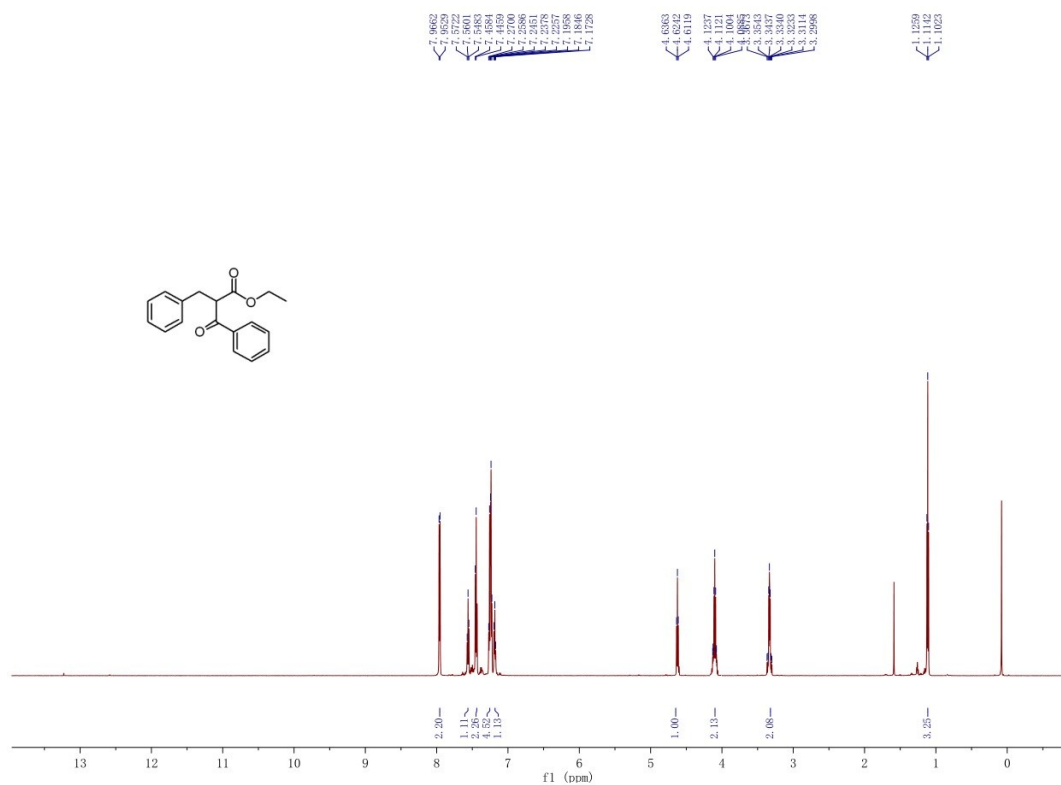

### The <sup>1</sup>H NMR Spectra of 6b

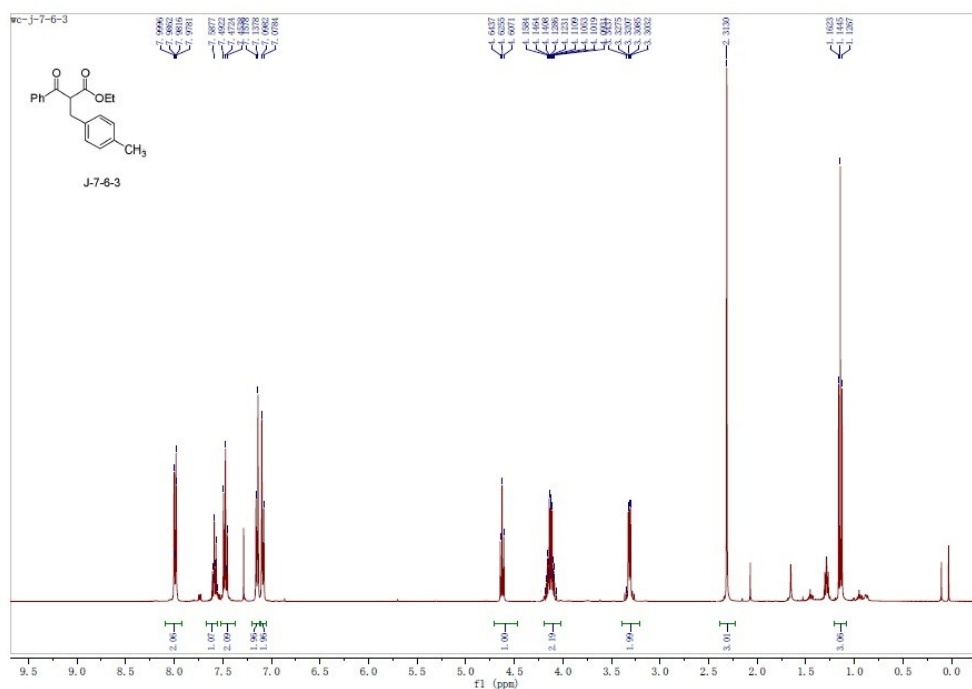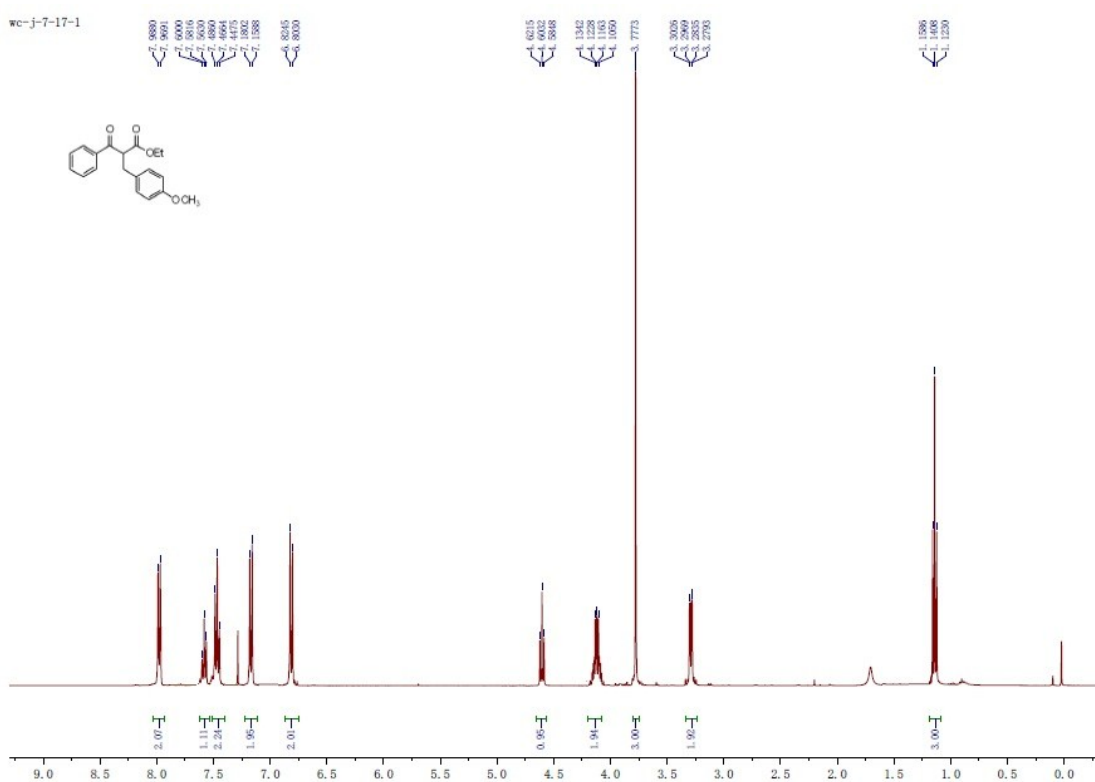

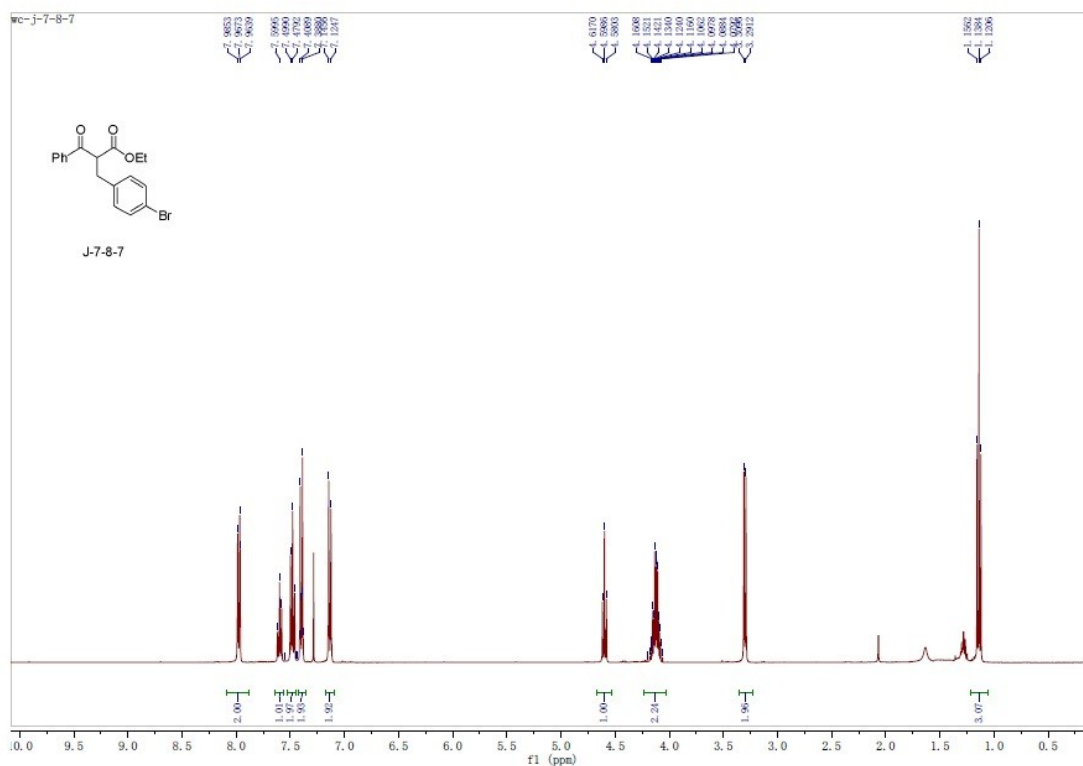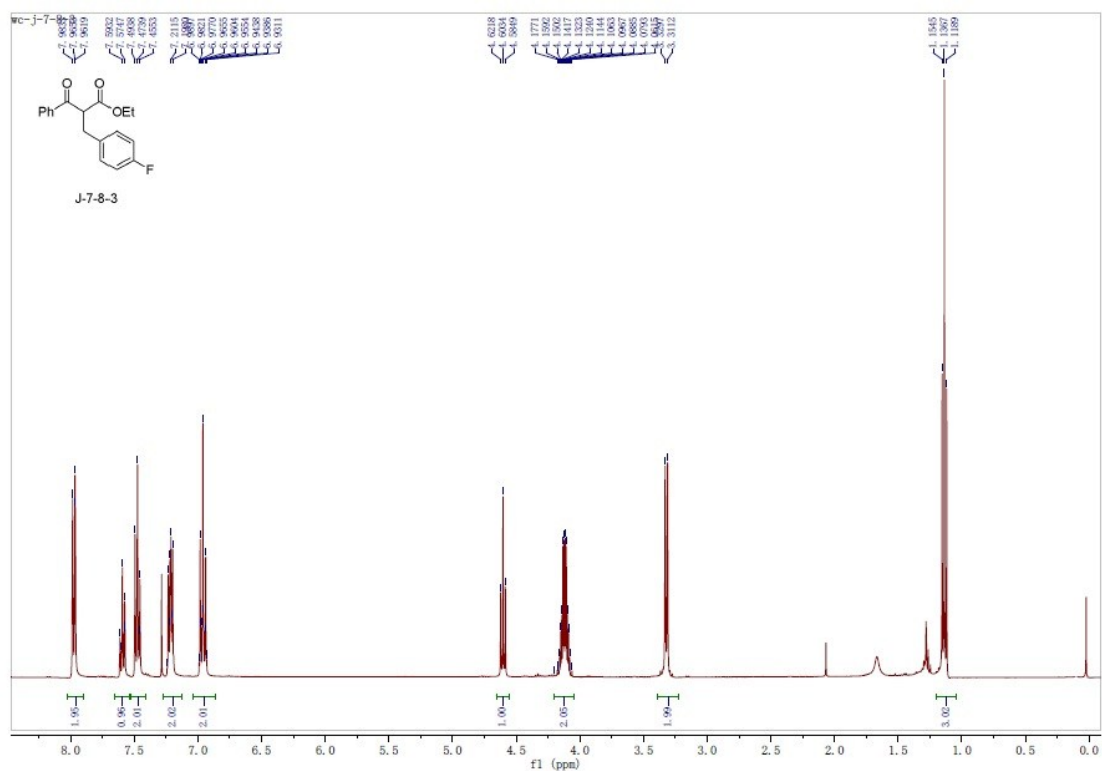

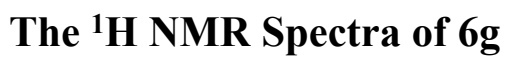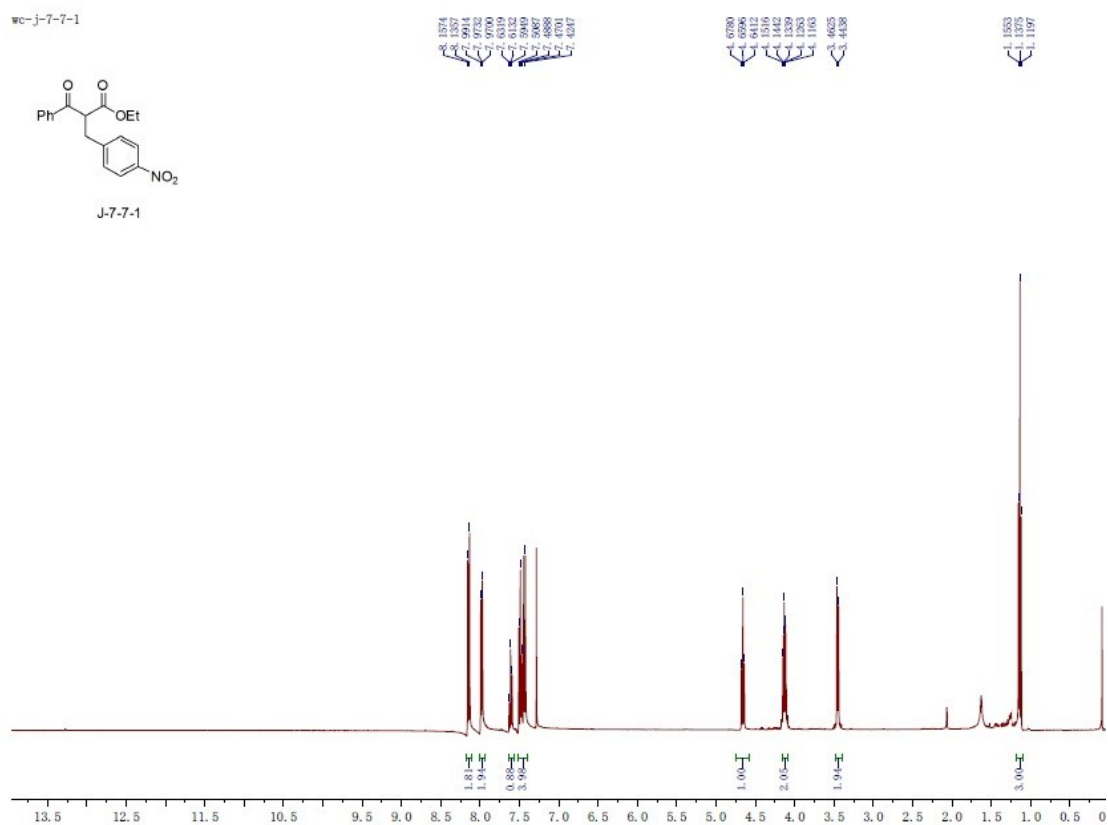

## The $^1\text{H}$ NMR Spectra of 6i

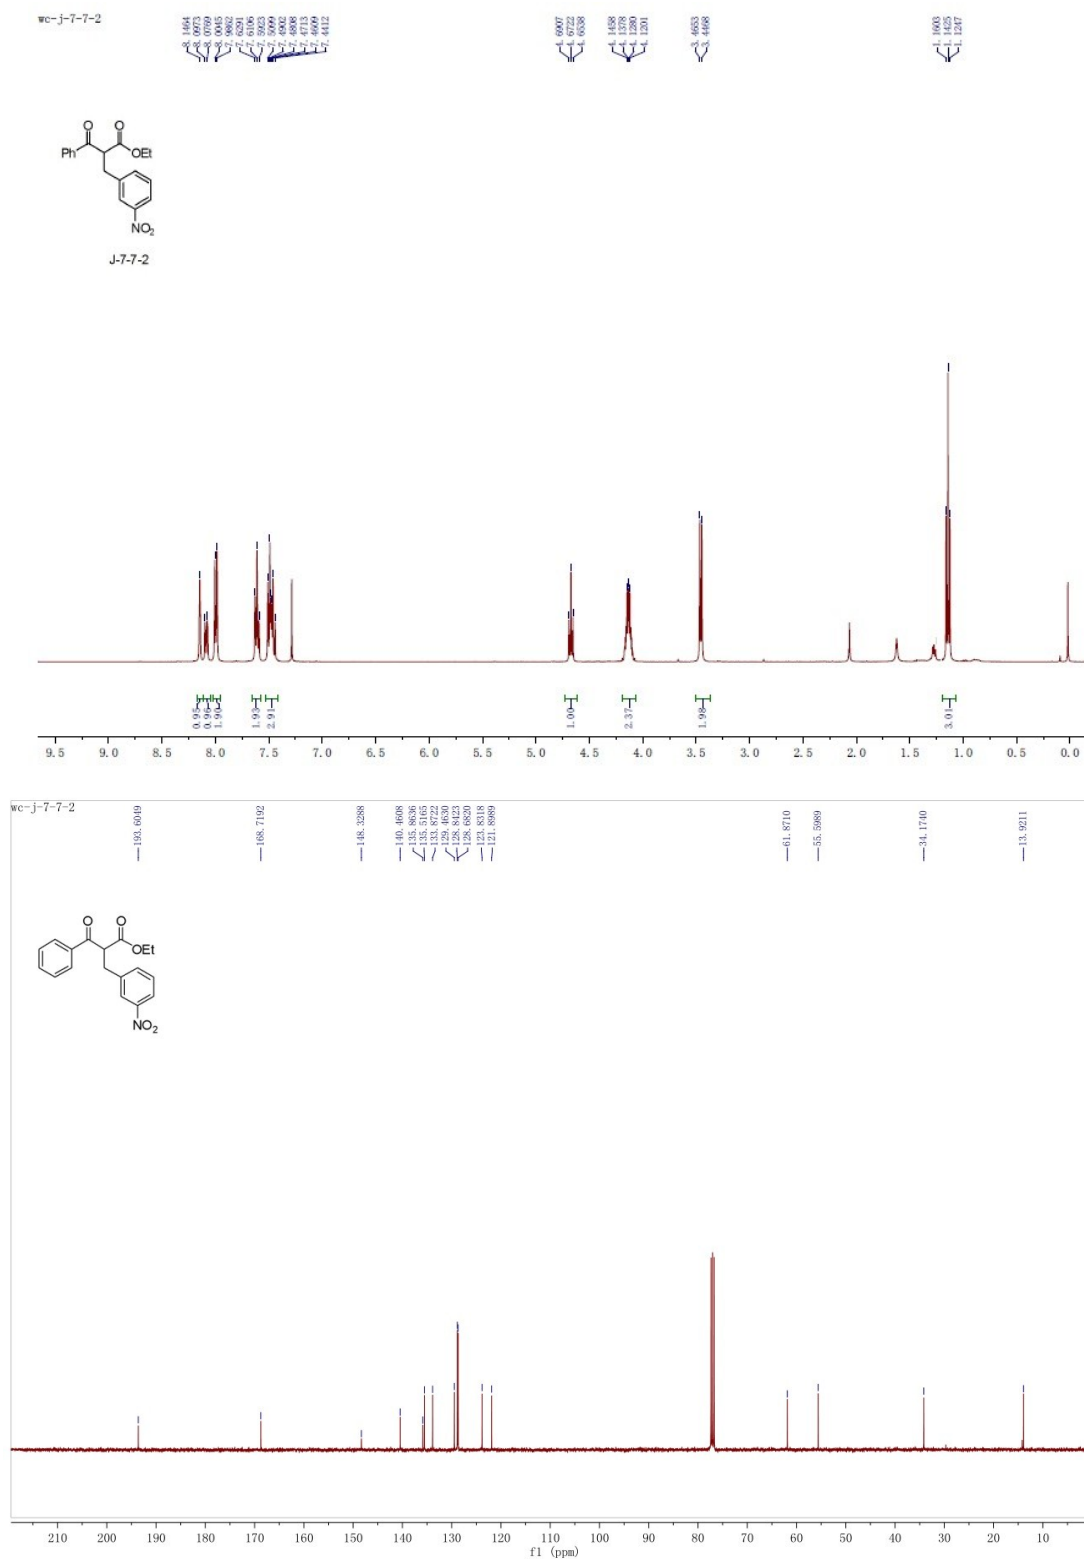

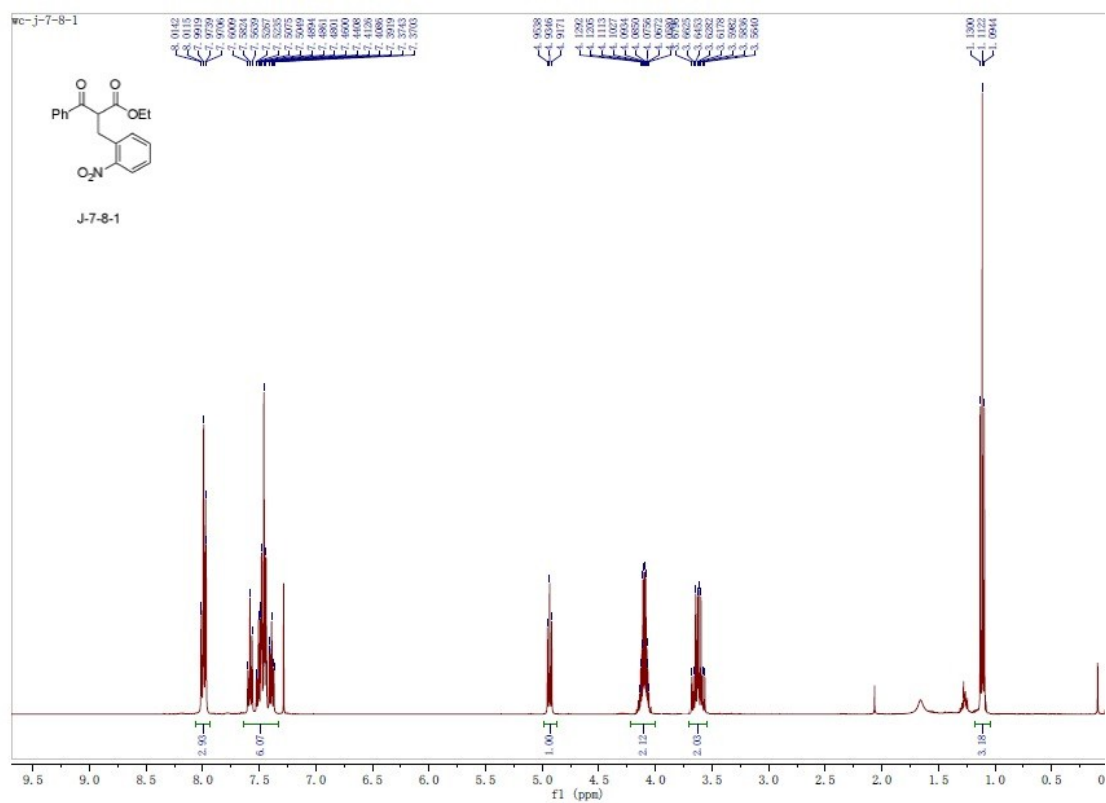

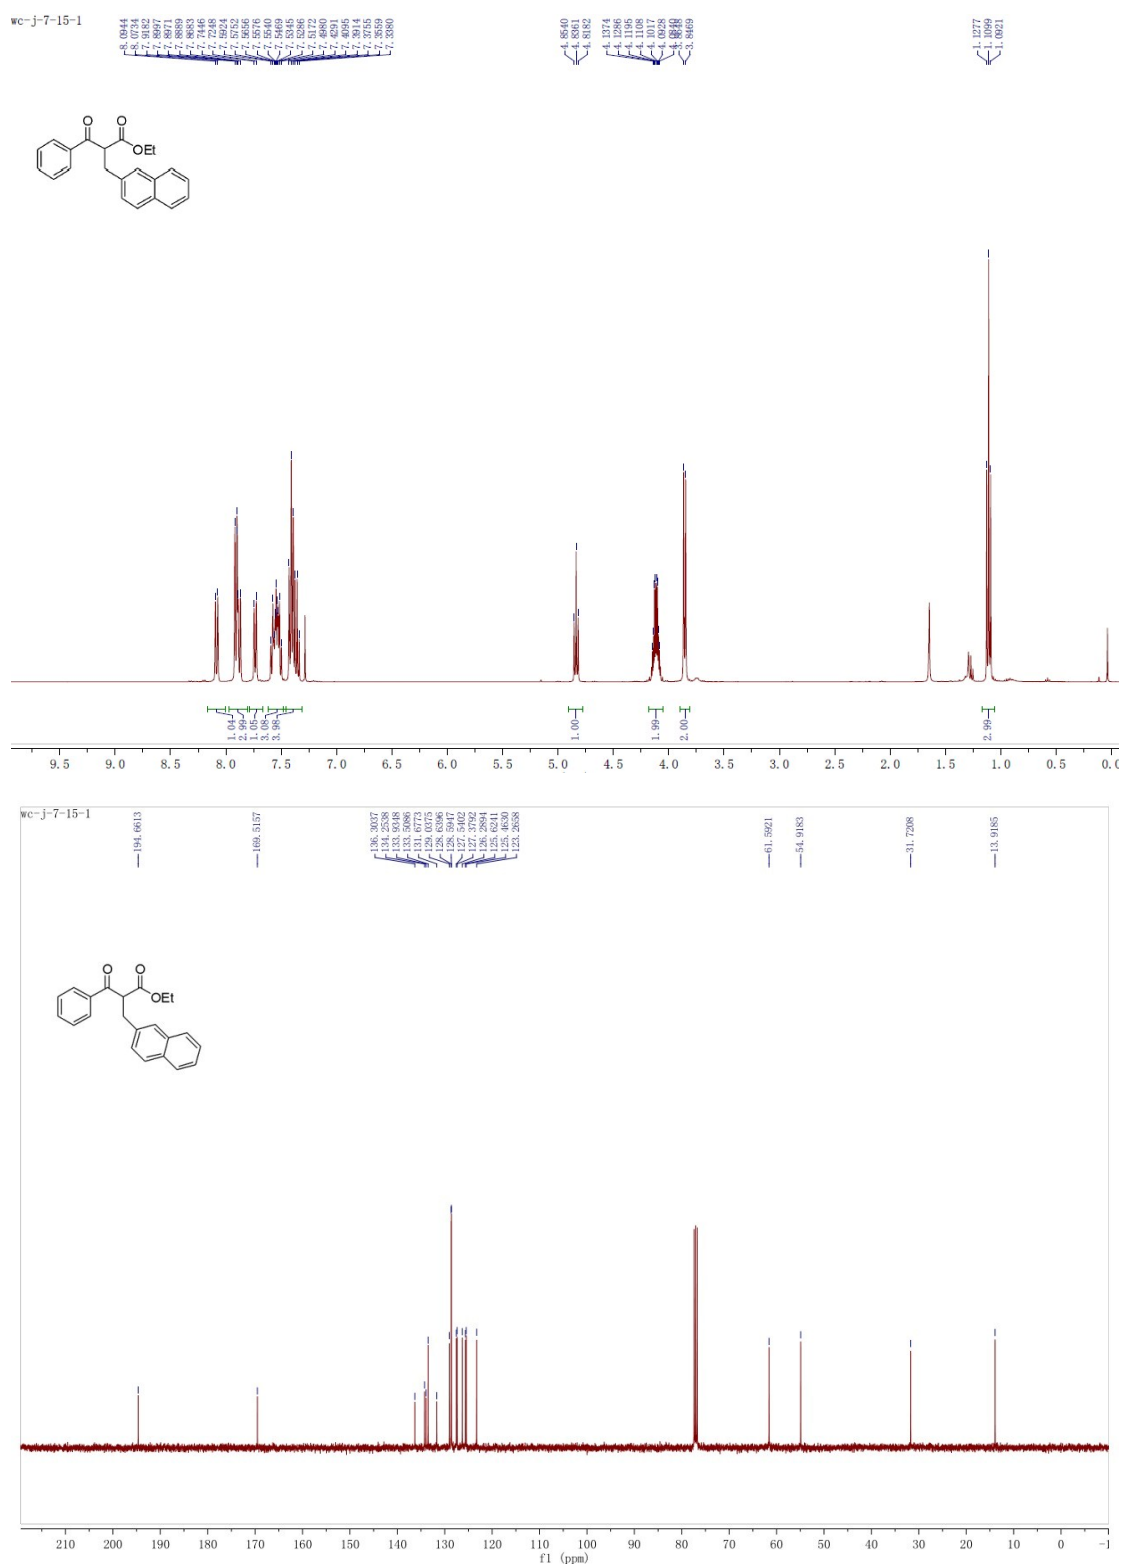

The  $^1\text{H}$  NMR Spectra of 6k

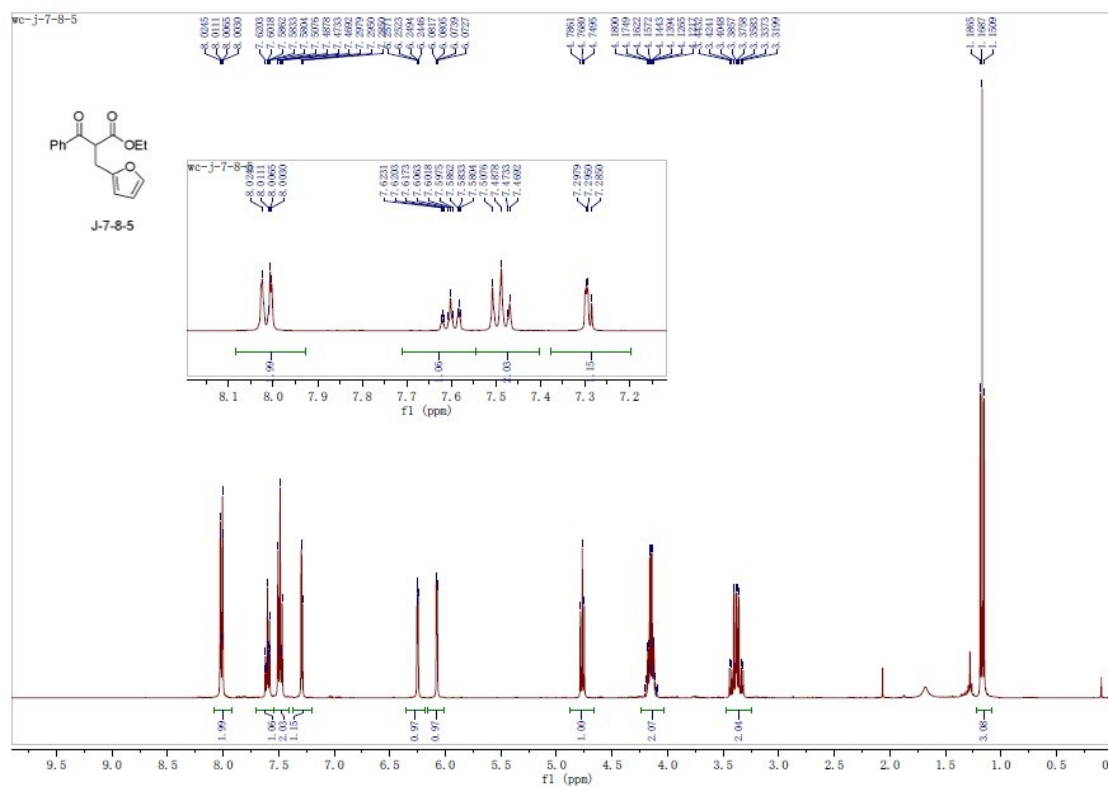

The <sup>1</sup>H NMR Spectra of **6l**

wc-j-7-40-1

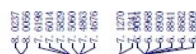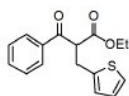

WC-J-7-40-1

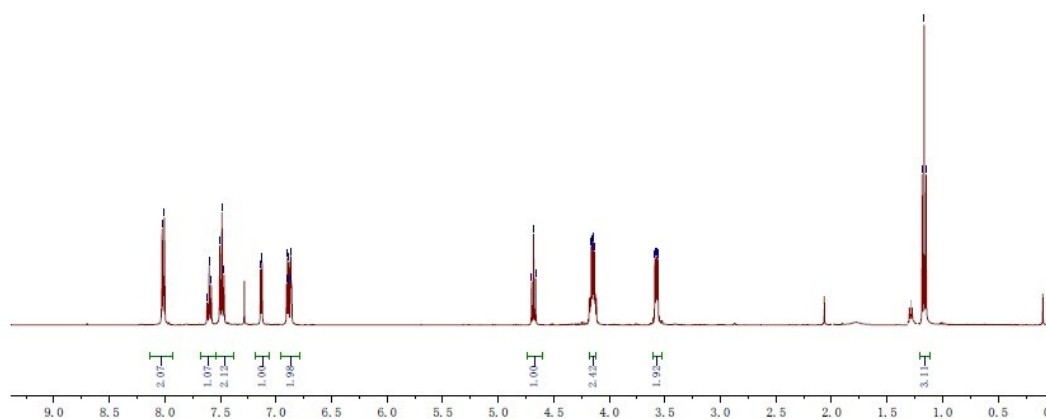

The <sup>1</sup>H NMR Spectra of 6m

wc-j-8-35-1

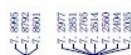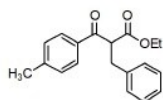

J-8-35-1

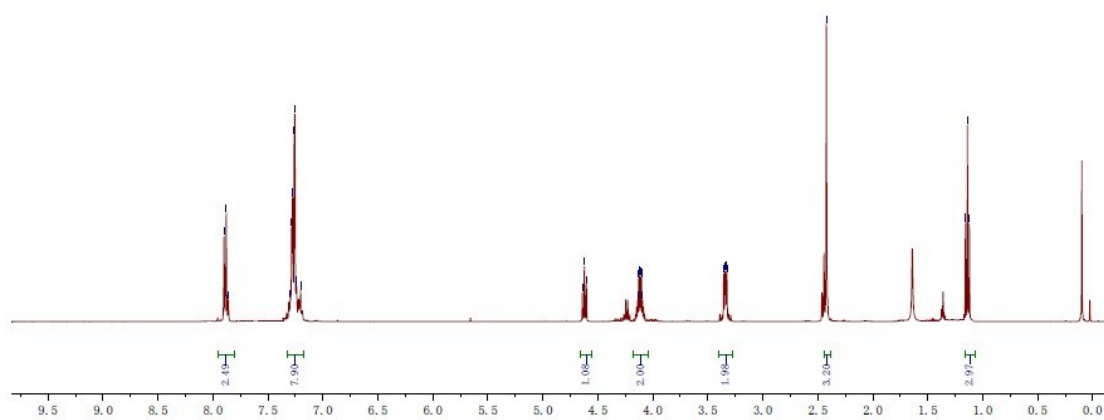

The <sup>1</sup>H NMR Spectra of 6n

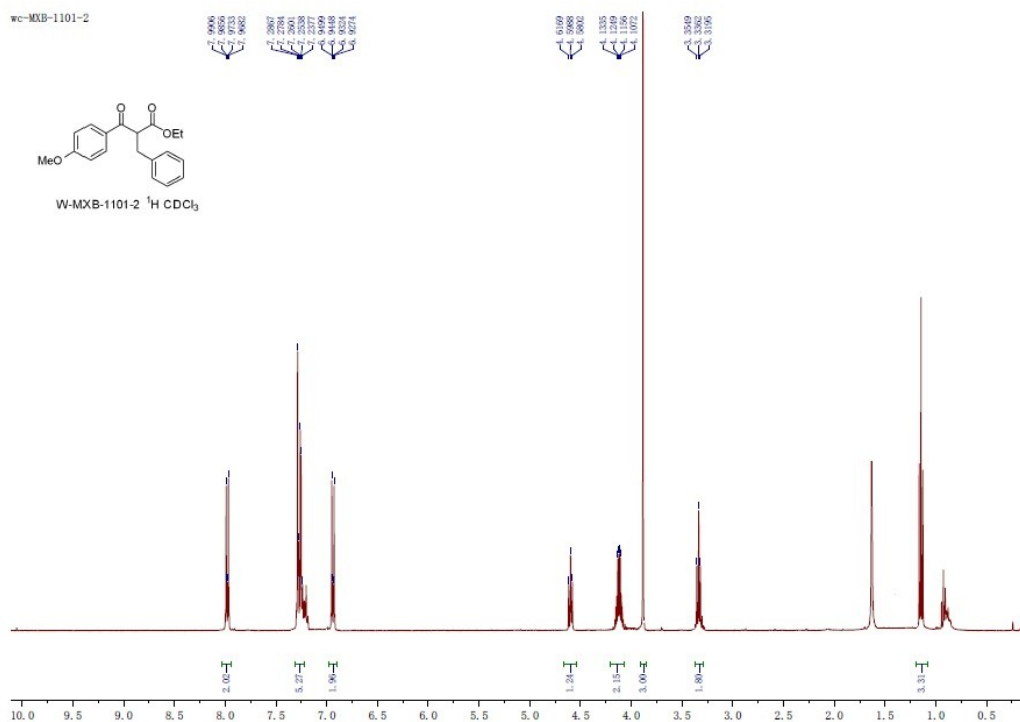

## The $^1\text{H}$ NMR Spectra of 6o

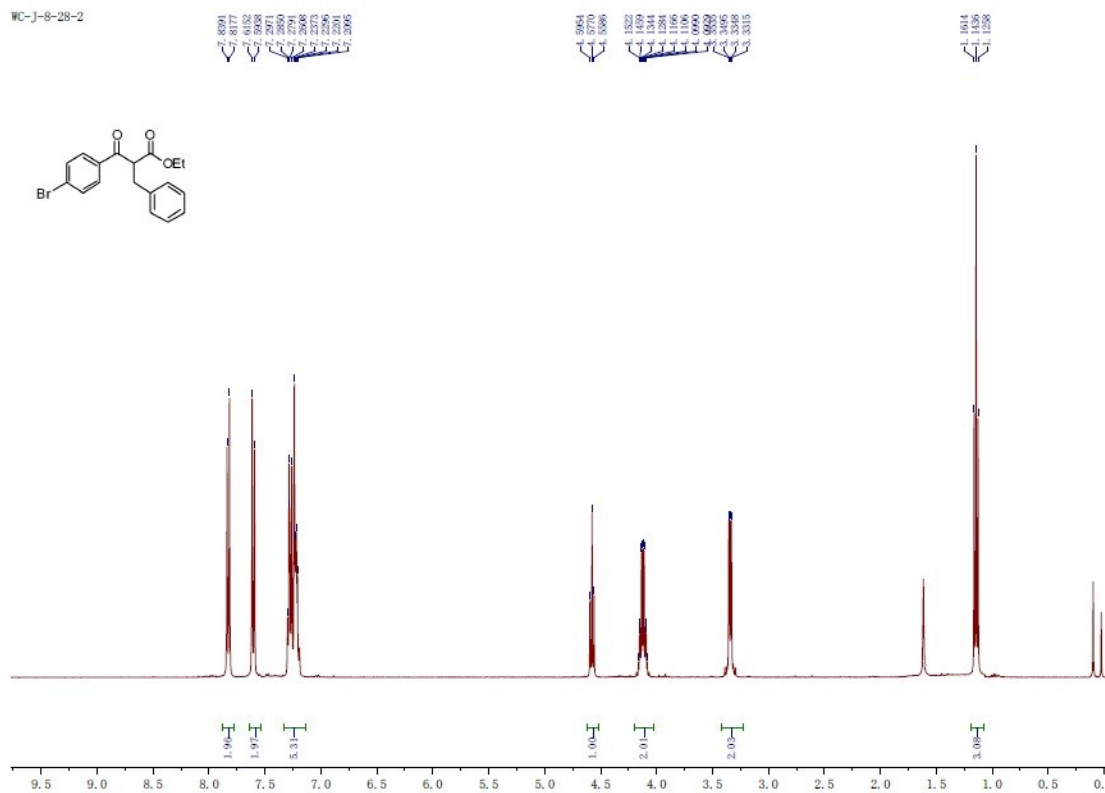

## The $^1\text{H}$ NMR Spectra of 6p

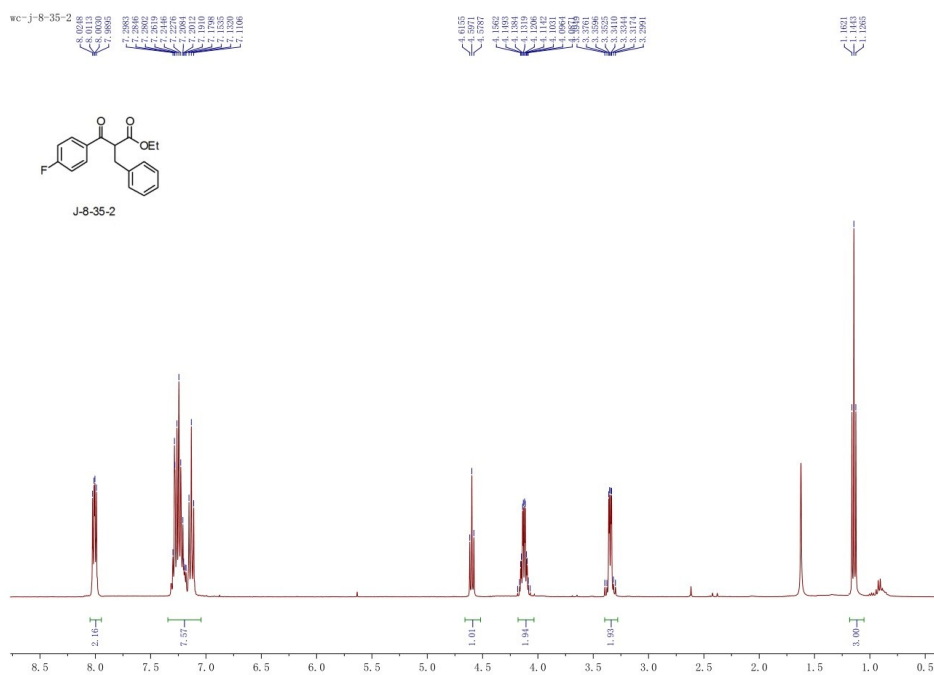

## The $^1\text{H}$ NMR Spectra of 6q

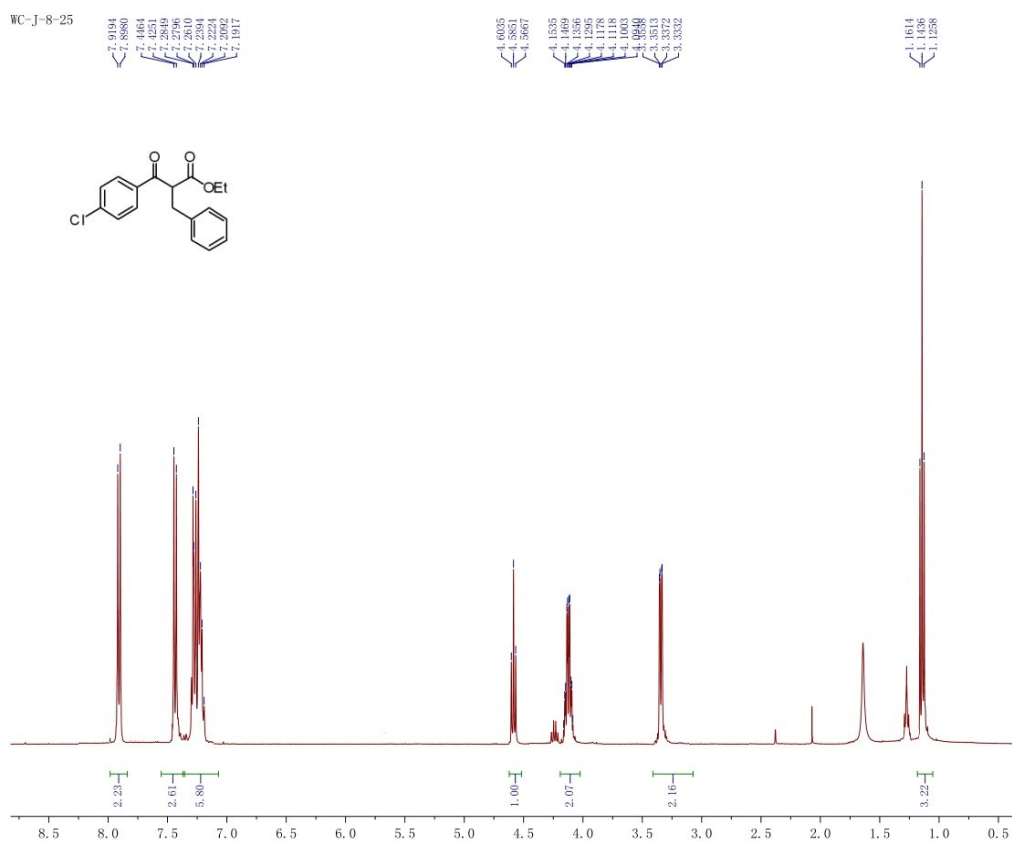

## The $^1\text{H}$ NMR Spectra of 6r



8.5045  
8.0336  
7.9708  
7.9504  
7.9140  
7.8935  
7.8777  
7.6320  
7.5900  
7.5728  
7.2851  
7.2635  
7.2287  
7.2182  
7.2073  
7.1954

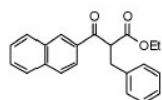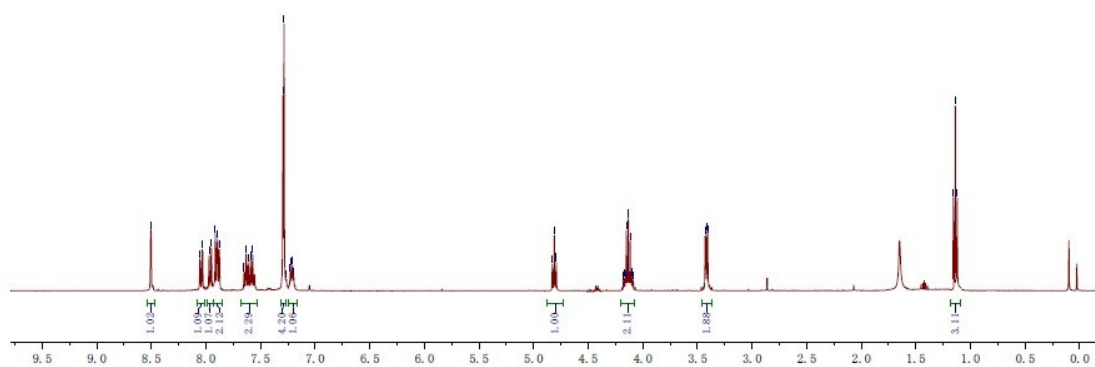

81

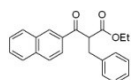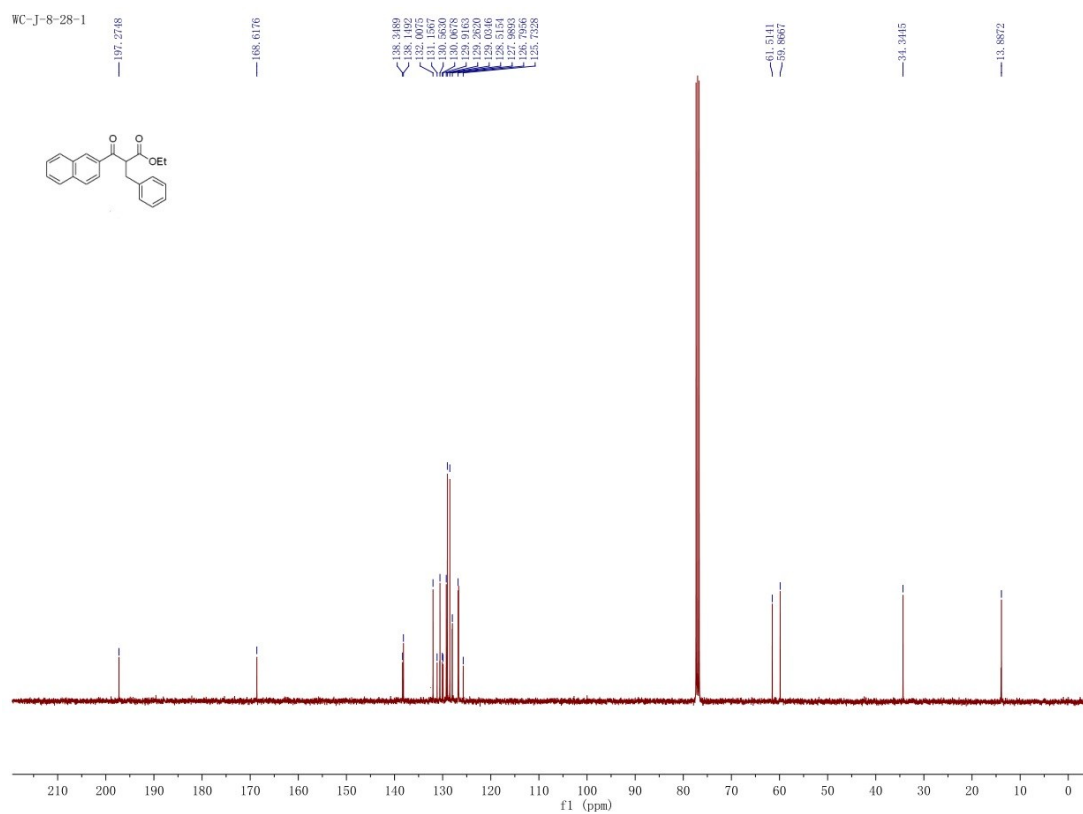

## The <sup>1</sup>H NMR Spectra of 6u

CCOC(=O)C(Cc1ccccc1)C(=O)c2ccsc2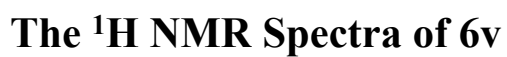CC(=O)C(CC1=CC=CC=C1)C(=O)OCC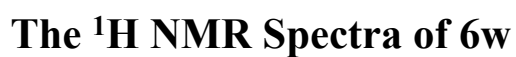

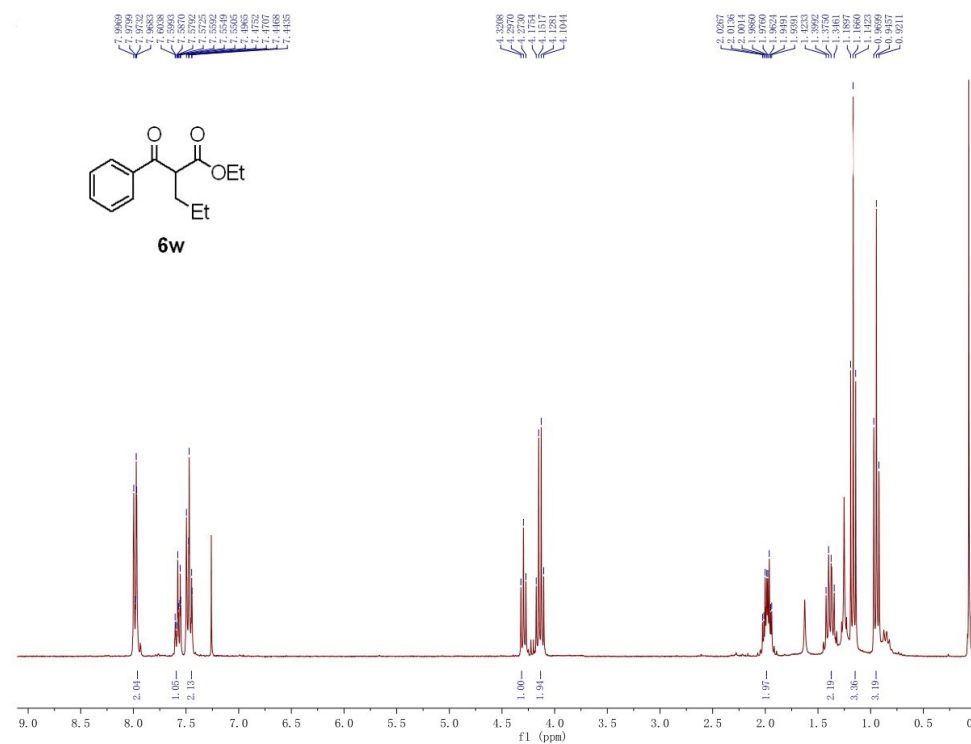

The <sup>1</sup>H NMR Spectra of **6y**

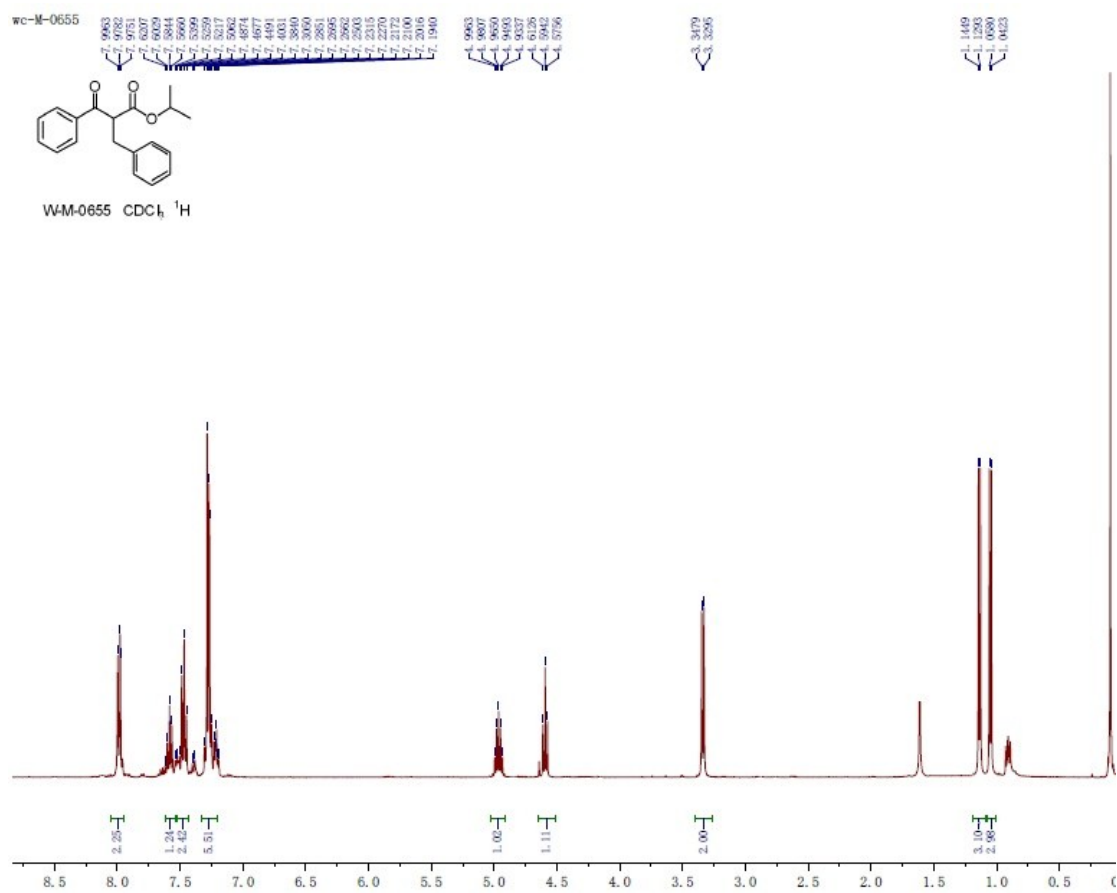

The <sup>1</sup>H NMR Spectra of **6z**

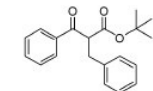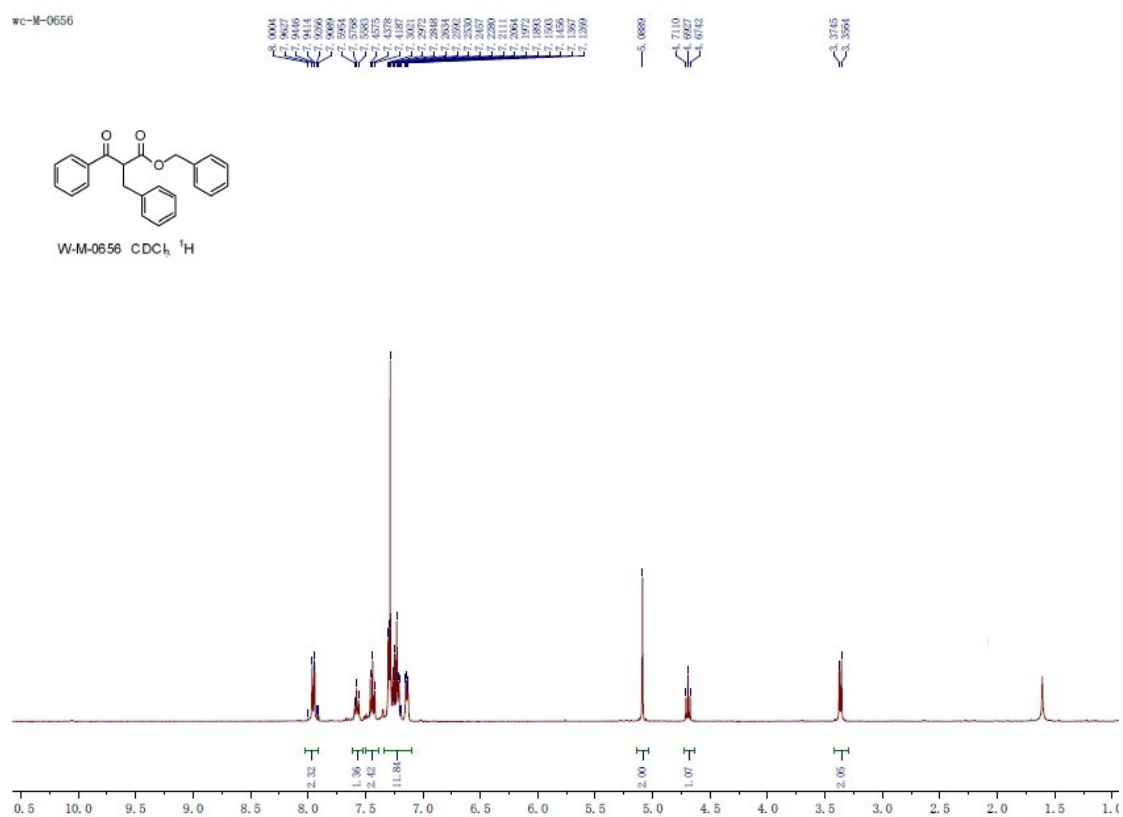

## The $^1\text{H}$ NMR Spectra of Cat 2

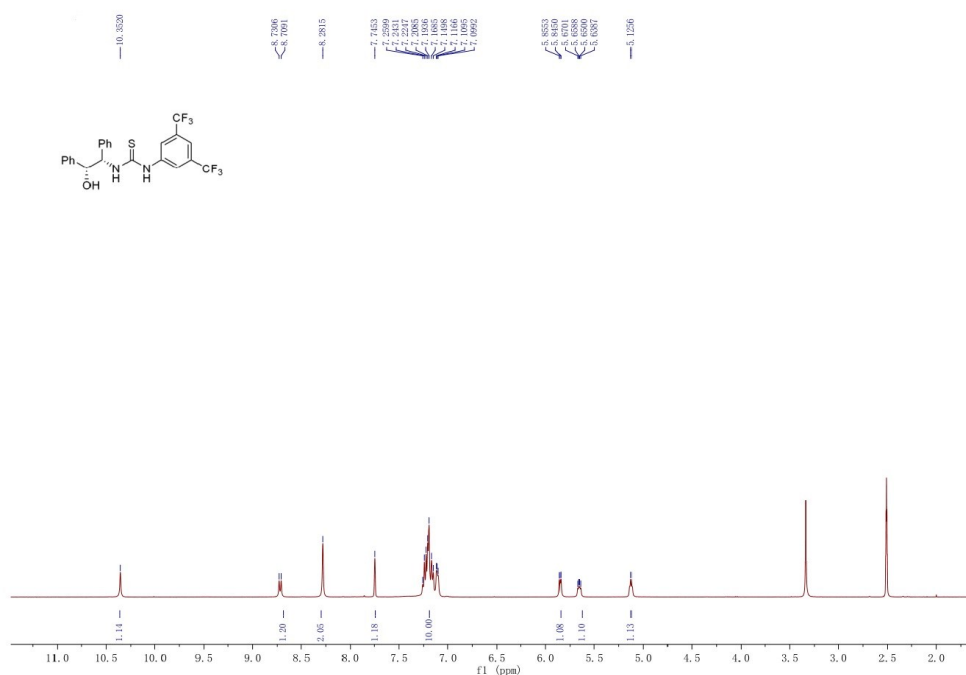

## The <sup>1</sup>H NMR Spectra of Cat 3

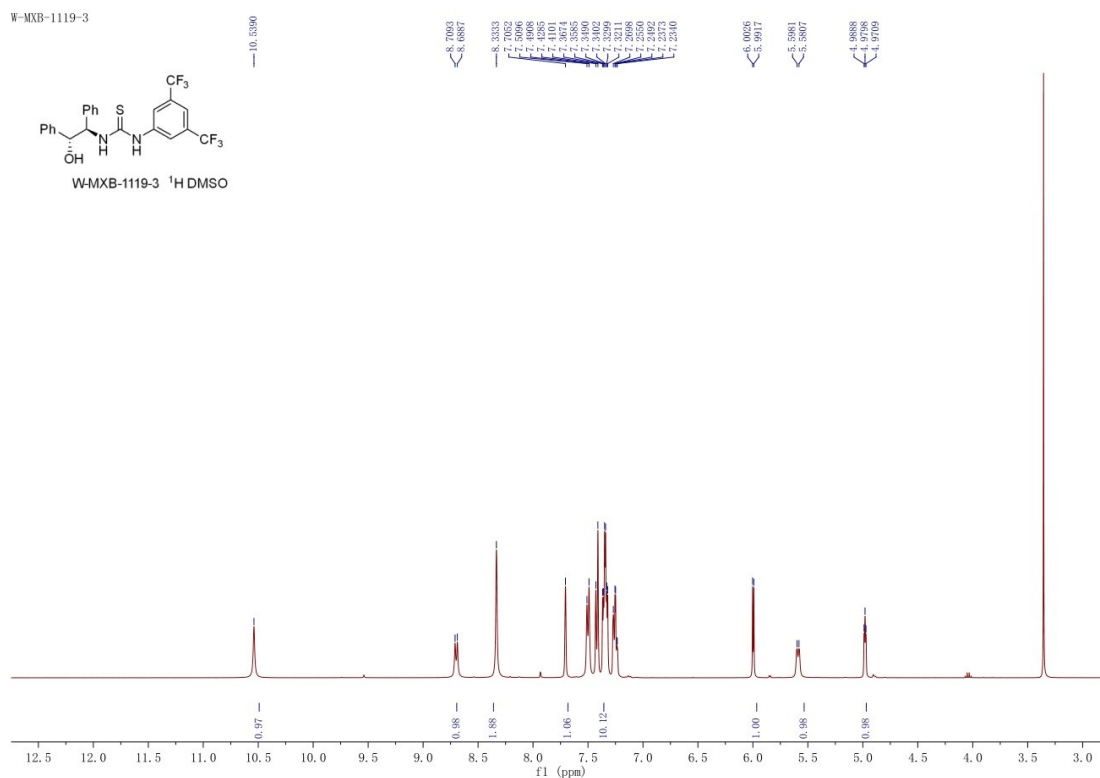

## The <sup>1</sup>H NMR Spectra of Cat 4

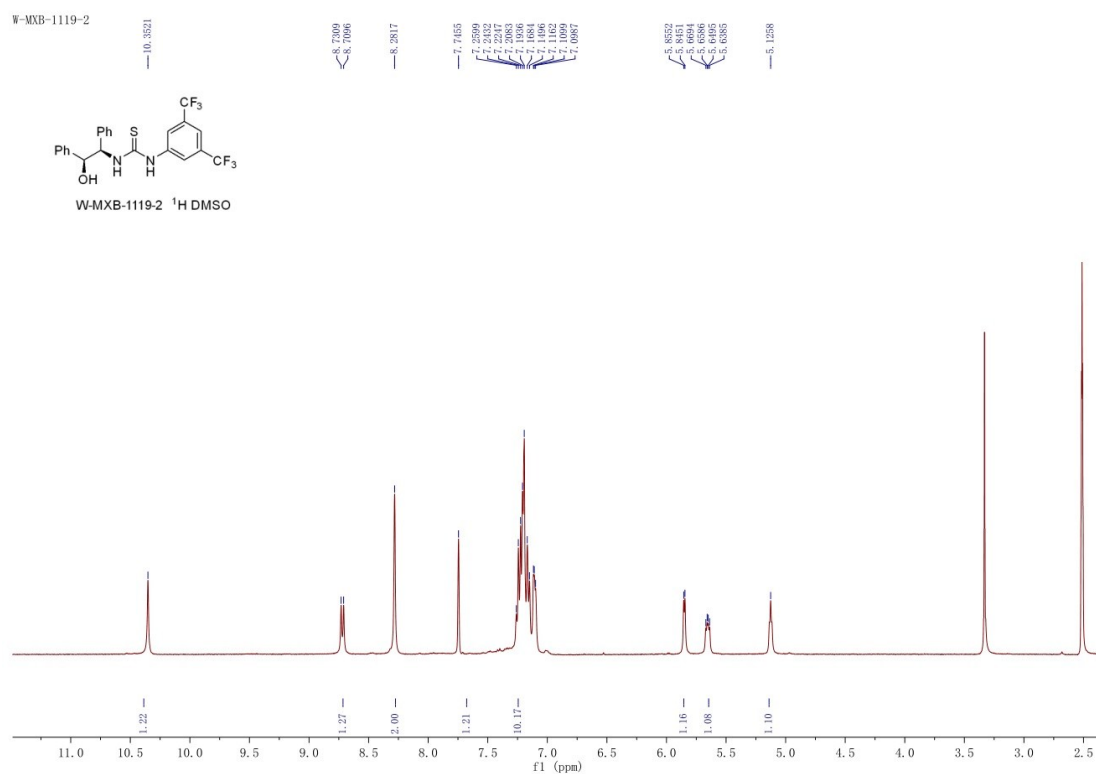

## The $^1\text{H}$ NMR Spectra of Cat 5

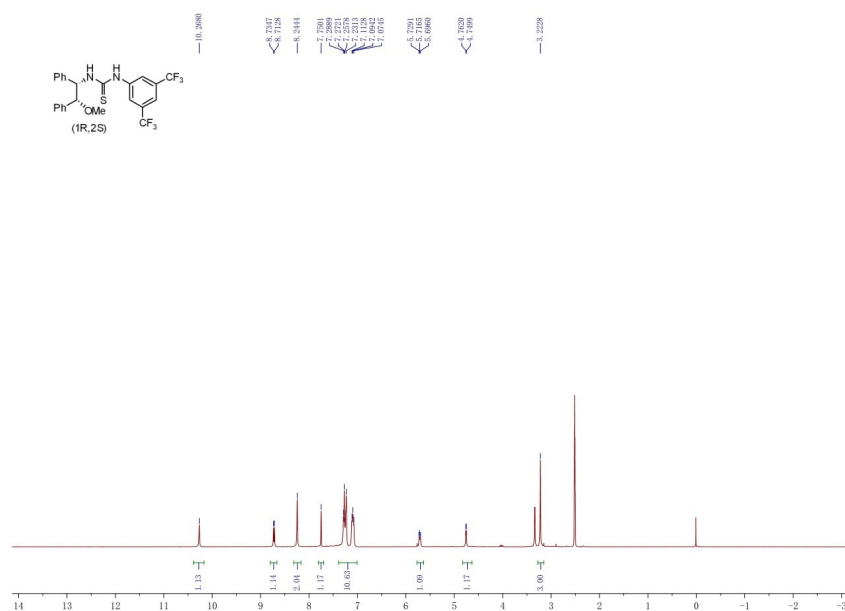

## The $^1\text{H}$ NMR Spectra of Cat 6

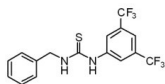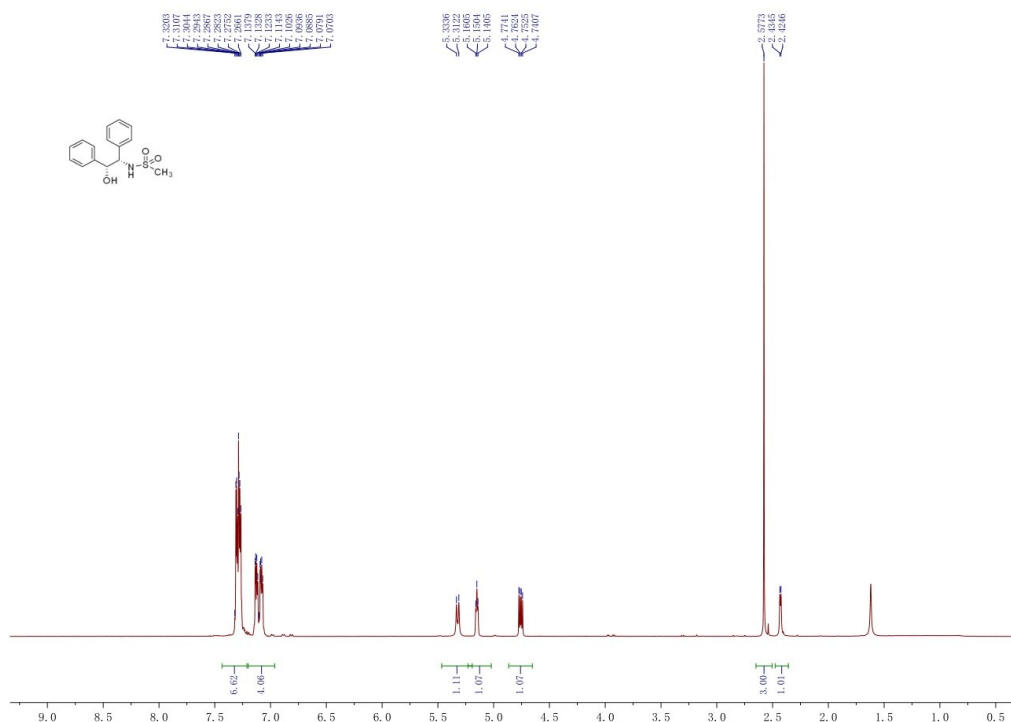

## The $^1\text{H}$ NMR Spectra of Cat 8

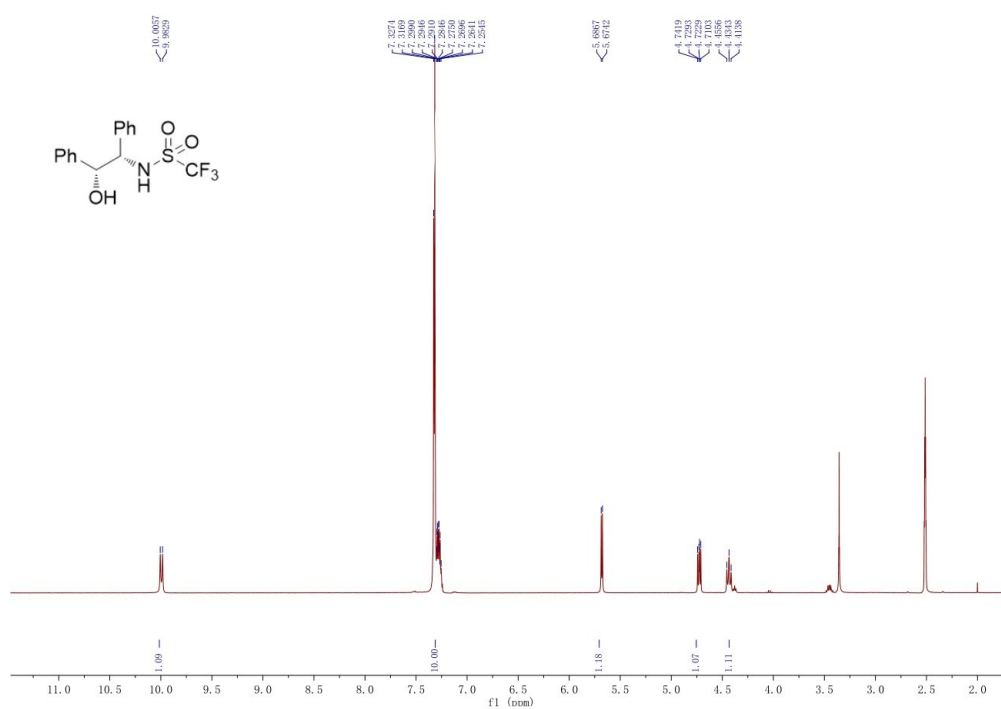

Supplement: c7ra00995j1.pdf [file c7ra00995j1.pdf]
